1     **A chiral selectivity relaxed paralog of DTD for proofreading tRNA**  
2                                     **mischarging in Animalia**

3  
4     Santosh Kumar Kuncha,<sup>1,2\*</sup> Mohd Mazeed,<sup>1\*</sup> Raghvendra Singh,<sup>1</sup> Bhavita Kattula,<sup>1</sup> Satya Brata  
5     Routh,<sup>1</sup> Rajan Sankaranarayanan<sup>1†</sup>

6     <sup>1</sup>CSIR–Centre for Cellular and Molecular Biology, Uppal Road, Hyderabad – 500007, India.

7     <sup>2</sup>Academy of Scientific and Innovative Research (AcSIR), CSIR–CCMB campus, Uppal Road,  
8     Hyderabad – 500007, India.

9     \*These authors contributed equally to this work

10    †Corresponding author. Email: [sankar@ccmb.res.in](mailto:sankar@ccmb.res.in) (R.S.)

## 11 ABSTRACT

12 D-aminoacyl-tRNA deacylase (DTD), a *trans*-editing factor found in bacteria and eukaryotes,  
13 removes D-amino acids mischarged on tRNAs as well as achiral glycine mischarged on tRNA<sup>Ala</sup>.  
14 An invariant cross-subunit Gly-*cis*Pro motif forms the mechanistic basis of strict L-amino acid  
15 rejection from the catalytic site. Here, we present the identification of a DTD variant, named  
16 ATD (Animalia-specific tRNA deacylase), that harbors a Gly-*trans*Pro motif. The *cis*-to-*trans*  
17 switch causes a “gain of function” through L-chiral selectivity in ATD resulting in the clearing  
18 of L-alanine mischarged on tRNA<sup>Thr</sup>(G4•U69) by eukaryotic AlaRS. The biochemical  
19 proofreading activity of ATD is conserved across diverse classes of phylum Chordata. Animalia  
20 genomes enriched in tRNA<sup>Thr</sup>(G4•U69) genes are in strict association with the presence of ATD,  
21 underlining the mandatory requirement of a dedicated factor to proofread tRNA  
22 misaminoacylation. The study highlights the emergence of ATD during genome expansion as a  
23 key event associated with the evolution of Animalia.

## 24 INTRODUCTION

25 Translational quality control is a complex and tightly regulated process which involves editing of  
26 errors in most scenarios. However, it also encompasses a targeted and selective compromise in  
27 fidelity, thereby allowing percolation of errors under specific conditions such as oxidative stress.  
28 It ensures an optimum dynamic balance in the cellular proteome and hence overall cellular  
29 homeostasis. A multitude of factors—from aminoacyl-tRNA synthetases (aaRSs) to ribosome as  
30 well as proteasome—play significant roles in performing this complex phenomenon (**Brandman**  
31 **and Hegde, 2016; Bullwinkle et al., 2014; Guo and Schimmel, 2012; Ibba and Söll, 2000;**  
32 **Moghul et al., 2014; Ogle and Ramakrishnan, 2005; Pouplana et al., 2014; Rodnina, 2016;**  
33 **Rodnina and Wintermeyer, 2016; Schwartz and Pan, 2017; Simms et al., 2017**). A key step  
34 in this process includes decoupling of D-amino acids mischarged on tRNAs. This function,  
35 termed “chiral proofreading”, is performed by a dedicated *trans*-editing factor called D-  
36 aminoacyl-tRNA deacylase (DTD) (**Ahmad et al., 2013; Calendar and Berg, 1967; Ferri-**  
37 **Fioni et al., 2001; Soutourina et al., 1999**). The chiral proofreading enzyme forms one of the  
38 major cellular checkpoints, which also includes aaRSs, elongation factor Tu (EF-Tu) and  
39 ribosome, to prevent infiltration of D-amino acids into translational machinery (**Agmon et al.,**  
40 **2004; Ban et al., 2000; Bhuta et al., 1981; Englander et al., 2015; Jonak et al., 1980; Ling et**  
41 **al., 2009; Pingoud and Urbanke, 1980; Yamane et al., 1981**).

42 DTD—present throughout Bacteria (except cyanobacteria) and Eukarya—employs an invariant  
43 cross-subunit Gly-*cis*Pro motif in the active site to ensure substrate stereospecificity. The *cis*  
44 conformation of the motif disposes the two carbonyl oxygens in a parallel orientation, projecting  
45 them directly into the active site pocket (**Ahmad et al., 2013**). Such an architecture of DTD’s  
46 chiral proofreading site leads to steric exclusion of even the smallest amino acid with L-chirality,

47 *viz.*, L-alanine. Thus, strict L-chiral rejection forms the only mechanistic basis of DTD's  
48 enantioselectivity. Consequently, the chiral proofreading site is completely porous to achiral  
49 glycine and exhibits unwarranted activity on the cognate Gly-tRNA<sup>Gly</sup>. The glycine “misediting  
50 paradox” thereby generated is effectively resolved through protection of the cognate achiral  
51 substrate by EF-Tu (**Routh et al., 2016**). Nevertheless, our recent findings have demonstrated  
52 that the porosity of DTD's active site to glycine is advantageous, since it enables the enzyme to  
53 efficiently clear the non-cognate Gly-tRNA<sup>Ala</sup> species generated by alanyl-tRNA synthetase  
54 (AlaRS). Therefore, DTD's cellular function extends beyond just chiral proofreading during  
55 faithful translation of the genetic code (**Pawar et al., 2017**). Interestingly, in archaea and  
56 cyanobacteria, chiral proofreading is performed by DTD2 and DTD3, respectively; the latter two  
57 are non-homologous to DTD (**Ferri-Fioni et al., 2006; Wydau et al., 2009**). However, in  
58 archaea, which lack DTD, a DTD-like module is covalently appended to threonyl-tRNA  
59 synthetase (ThrRS) as the N-terminal domain (NTD) that edits L-serine misacylated on tRNA<sup>Thr</sup>  
60 (**Dwivedi et al., 2005; Hussain et al., 2006, 2010; Korencic et al., 2004**). Thus, both DTD-like  
61 fold (comprising DTD and NTD) and chiral proofreading function (performed by DTD, DTD2  
62 and DTD3) are conserved across all domains of life. Biochemically, the DTD-like fold is an  
63 RNA-based catalyst that employs only the 2'-OH of adenosine-76 (A76) at the 3'-terminus of  
64 tRNA rather than protein side chains for catalysis at the RNA–protein interface (**Ahmad et al.,**  
65 **2015; Routh et al., 2016**).

66 Proofreading during aminoacyl-tRNA synthesis has been proposed and extensively studied so far  
67 in the context of errors only in amino acid selection by aaRSs (**Dock-Bregeon et al., 2000;**  
68 **Fersht, 1977, 1998; Fukai et al., 2000; Jakubowski and Fersht, 1981; Lincecum et al., 2003;**  
69 **Matinis and Boniecki, 2010; Nureki et al., 1998; Pauling, 1958; Perona and Gruic-Sovulj,**

70 **2014; Silvian et al., 1999; Yadavalli and Ibba, 2012**). Defects in proofreading have been  
71 associated with multiple cellular pathologies including neurodegeneration in mouse and cell  
72 death (**Bacher et al., 2005; Bullwinkle et al., 2014; Bullwinkle and Ibba, 2016; Karkhanis et**  
73 **al., 2007; Kermgard et al., 2017; Korencic et al., 2004; Lee et al., 2006; Liu et al., 2014; Lu**  
74 **et al., 2014; Moghal et al., 2016; Mohler et al., 2017; Nangle et al., 2002; Roy et al., 2004**).  
75 Amino acids are substantially smaller in size compared to tRNAs, and are also similar in  
76 structure/chemistry in several cases. Consequently, errors in amino acid selection by synthetases  
77 are significantly higher (about one in  $10^3$ – $10^2$ ) than the overall error observed during translation  
78 of the genetic code (about one in  $10^4$ – $10^3$ ) (**Loftfield and Vanderjagt, 1972; Perona and**  
79 **Gruic-Sovulj, 2014; Yadavalli and Ibba, 2012**). Errors in tRNA selection, which either happen  
80 naturally and constitutively or are induced by environmental conditions (such as  
81 oxidative/temperature/antibiotic stress), have been noted in several instances, although such  
82 mistakes are not as common as those in amino acid selection (**Gomes et al., 2007; Netzer et al.,**  
83 **2009; Schwartz and Pan, 2016; Schwartz et al., 2016; Sheppard et al., 2008**). However,  
84 dedicated proofreading factors for correcting mistakes in tRNA selection have not been reported  
85 till date.

86 Here, we describe the identification and characterization of a novel DTD-like factor, named  
87 ATD (Animalia-specific tRNA deacylase). Present in kingdom Animalia and more specifically  
88 all across phylum Chordata, ATD proofreads a critical tRNA selection error made by AlaRS. An  
89 unprecedented switch from the chiral-selective “Gly-*cis*Pro” dipeptide in DTD to “Gly-*trans*Pro”  
90 in ATD is the key to ATD’s gaining of L-chiral selectivity. This “gain of function” through  
91 relaxation of substrate chiral specificity underlies ATD’s unique capability of correcting the error  
92 in tRNA selection. The strict coexistence of the proofreading factor with the error-inducing

93 tRNA species underlines its requirement for translational quality control in Animalia. Our study  
94 represents the first instance of a proofreading factor being identified as one that is responsible for  
95 the correction of an error in tRNA selection during translation of the genetic code.

## 96 **RESULTS**

### 97 **Two characteristic sequence motifs in ATD show subtle differences from those in DTD**

98 While performing protein BLAST-based *in silico* search for DTD sequences, we came across  
99 many sequences in the database which are annotated as probable DTD2. However, these  
100 sequences bear no sequence similarity to the canonical DTD2 present in Archaea. Therefore, we  
101 renamed this protein ATD (as explained later) to distinguish it from the canonical DTD2 and  
102 avoid confusion over nomenclature. Moreover, DTD and ATD share less than 30% sequence  
103 identity between them which is significantly lower than that between DTDs (>50%) or between  
104 ATDs (>45%) (**Figure 1—figure supplement 1**). Besides, ATD also does not show homology  
105 with DTD3. Multiple sequence alignment of ATD and DTD sequences showed that ATD has –  
106 PQATL– and –TNGPYTH– as signature motifs, which are similar to though distinct from the  
107 corresponding active site motifs in DTD, *viz.*, –SQFTL– and –NXGPVT–, respectively (**Figure**  
108 **1A**). Strikingly, some of the key conserved residues near DTD’s active site, involved in a  
109 network of interactions and responsible for holding the Gly-*cis*Pro motif, are also different in  
110 ATD. The most notable among these is a highly conserved arginine in DTD (Arg7 in DTD from  
111 *Escherichia coli* (EcDTD) or *Plasmodium falciparum* (PfDTD)) which is replaced by a  
112 conserved glutamine in ATD (Gln16 in ATD from *Mus musculus* (MmATD)) (**Figure 1A**).  
113 Thus, comparative analysis of ATD and DTD sequences showed subtle variations in some of the  
114 key conserved residues present in and near the active site.

115 **ATD is found in kingdom Animalia and throughout phylum Chordata**

116 A thorough *in silico* search for ATD sequences revealed that ATD is present in Eukarya, but  
117 absent in Bacteria and Archaea. Within Eukarya, ATD is present exclusively in kingdom  
118 Animalia, except for a few protozoa (four species of *Leishmania*, two of *Trypanosoma*, and one  
119 each of *Saprolegnia*, *Salpingoeca* and *Acanthamoeba*, whose genomes have been sequenced)  
120 (**Data 1**). More importantly, ATD is found all across phylum Chordata, whereas its distribution  
121 in non-chordate phyla is rather sparse (**Figure 1—figure supplement 2, Data 1**). It is worth  
122 noting that most of the protozoa that harbor ATD are parasites of various vertebrate hosts.  
123 Therefore, ATDs from these protozoa may be outliers as the possibility of horizontal transfer of  
124 ATD gene to these protozoa from their host organisms cannot be ruled out. Contrary to ATD's  
125 restricted distribution in Animalia, DTD is found throughout Bacteria and Eukarya.  
126 Nevertheless, phylogenetic analysis of ATD and DTD showed that the two fall into two distinct  
127 groups (**Figure 1B**).

128 **ATD belongs to the DTD-like fold**

129 To gain insights into ATD's function, we solved the crystal structure of MmATD at 1.86 Å  
130 resolution. We were able to solve the structure by molecular replacement using PfDTD as the  
131 search model, despite the fact that the two share less than 30% sequence identity (**Figure 1C,**  
132 **Table S1**). Structural superposition of MmATD on PfDTD and NTD from *Pyrococcus abyssi*  
133 (PabNTD) showed an r.m.s.d. of 1.68 Å over 141 Ca atoms and 3.34 Å over 77 Ca atoms,  
134 respectively (**Figure 1C, Figure 1—figure supplement 3A**). As is the case with DTD and NTD,  
135 ATD too is a homodimeric protein. Interestingly, a Dali-based PDB search for structural  
136 homologs of ATD identified a protein (ATD) from *Leishmania major* (LmATD) which is  
137 annotated as a probable eukaryotic DTD, and deposited by Structural Genomics of Pathogenic

138 Protozoa Consortium (**Fan et al., 2008**). Structural superimposition of LmATD on MmATD  
139 gives an r.m.s.d. of 1.29 Å over 148 C $\alpha$  atoms (**Figure 1—figure supplement 3B**). Thus, like  
140 DTD and NTD, ATD also belongs to the DTD-like fold.

#### 141 **ATD harbors a Gly-*trans*Pro motif in the active site unlike DTD's Gly-*cis*Pro motif**

142 The crystal structure of ATD revealed that its characteristic motifs (–PQATL– and –TNGPYTH–  
143 ) are present at the dimeric interface just like the corresponding active site motifs of DTD (–  
144 SQFTL– and –NXGPVT–) (**Figure 2A**). Besides the elements of DTD-like fold, specific  
145 interactions at the adenine-binding site for the recognition of A76 of tRNA are also highly  
146 conserved in ATD (**Figure 2—figure supplement 1**). Surprisingly, MmATD's Gly-Pro motif  
147 occurs in *trans* conformation, unlike DTD's Gly-Pro motif which always exists in *cis*  
148 conformation as observed in 107 protomers of 19 crystal structures from 5 different organisms  
149 (**Figure 2B,C, Figure 2—figure supplement 2A**). Notably, LmATD also possesses a cross-  
150 subunit Gly-*trans*Pro motif like MmATD (**Figure 2—figure supplement 2B**). Atomic B-factor  
151 analysis revealed that ATD's Gly-*trans*Pro motif is rigid like DTD's Gly-*cis*Pro motif (**Figure**  
152 **2—figure supplement 3**). Additionally, ATD's Gly-Pro residues exhibit a dramatic change of  
153 approximately 180° in  $\psi$  torsion angle when compared to DTD's Gly-Pro residues due to  
154 remodeling of the local network of interactions in the vicinity of active site (**Figure 2D,E, Movie**  
155 **1**). DTD's Gly-*cis*Pro carbonyl oxygens are parallel and protrude into the active site pocket away  
156 from the protein core, *i.e.*, “outward parallel” orientation. ATD's Gly-*trans*Pro carbonyl oxygens  
157 are also parallel, but they face away from the active site toward the protein core, *i.e.*, “inward  
158 parallel” orientation (**Figure 2B,C**). Thus, a direct consequence of *cis*-to-*trans* switch has a  
159 marked influence on the orientation of the carbonyl oxygens of glycine and proline residues of  
160 the Gly-Pro motif that is responsible for L-chiral rejection in DTD.



161 **A conserved arginine near DTD's active site has migrated in ATD**

162 Upon further analysis of the active site region, it was observed that Arg7 in EcDTD or PfDTD,  
163 which is highly conserved in DTDs, is replaced by a conserved glutamine in ATD (Gln16 in  
164 MmATD). Interestingly, an invariant arginine is present in a totally different position in ATD  
165 (Arg151 in MmATD) (**Figure 1A, Figure 2E**). The side chain of Arg7 in PfDTD interacts with  
166 the main chain of Gly-*cis*Pro motif from the same monomer, thereby locking the motif rigidly in  
167 *cis* conformation (**Figure 2E**). This side chain–main chain interaction is conserved in all the  
168 available structures (107 protomers) of DTD (**Figure 2—figure supplement 4A**). In contrast,  
169 the interaction of MmATD's Arg151 side chain with the main chain of Gly-*trans*Pro motif from  
170 the dimeric counterpart pulls the motif's backbone outwards, thus holding the motif rigidly in  
171 *trans* conformation (**Figure 2E, figure supplement 4B**). Hence, the highly conserved arginine in  
172 the vicinity of DTD's active site has migrated to a different position near ATD's active site and  
173 is primarily responsible for the *cis-to-trans* switch of the Gly-Pro motif.

174 **ATD has “additional” space in its active site pocket due to flip of Gly-Pro carbonyl oxygens**

175 In DTD, the “outward parallel” orientation of Gly-*cis*Pro carbonyl oxygens acts as a “chiral  
176 selectivity filter” to strictly reject all L-amino acids from the pocket through steric exclusion  
177 (**Ahmad et al., 2013; Routh et al., 2016**). Comparative analysis of active sites of DTD and ATD  
178 further revealed that the inward flip of ATD's carbonyl oxygens due to *trans* conformation of its  
179 Gly-Pro motif has created “additional” space in its active site when compared to DTD.  
180 Consequently, ATD can easily accommodate a larger group in that space as opposed to just  
181 hydrogen in DTD (**Figure 2—figure supplement 5, Table S2**). This clearly suggests that ATD  
182 can cradle small L-amino acids in its active site pocket. The “additional” space created as a

183 consequence of Gly-*trans*Pro switch in ATD prompted us to check its biochemical activity  
184 profile on L-aminoacyl-tRNAs, in addition to D-aminoacyl- and glycyl-tRNAs.

### 185 **ATD exhibits relaxed substrate chiral specificity due to *cis*-to-*trans* switch**

186 The fact that ATD belongs to the DTD-like fold and its active site elements and architecture are  
187 similar to those of DTD indicated that it could be acting on some non-cognate aminoacyl-tRNA  
188 and hence could be involved in translational proofreading. Therefore, we generated the  
189 biochemical activity profile of MmATD by screening a spectrum of aminoacyl-tRNAs having  
190 either D- or L-amino acid as well as Gly-tRNA<sup>Gly</sup>. MmATD shows significant activity at 50 nM  
191 concentration on D-Tyr-tRNA<sup>Tyr</sup>, but fails to act on the L-counterpart even at 100-fold higher  
192 concentration (**Figure 3A,B**). It also deacylates Gly-tRNA<sup>Gly</sup> at 500 nM concentration (**Figure**  
193 **3C**). Thus, like DTD, ATD acts on both D-chiral and achiral substrates, albeit with significantly  
194 less efficiency. Strikingly, when tested with L-Ala-tRNA<sup>Ala</sup>, 500 nM MmATD displayed  
195 noticeable activity (**Figure 3D**). By contrast, EcDTD or PfDTD does not act on L-chiral  
196 substrates even at 100-fold higher concentration than required for D-chiral substrate (**Ahmad et**  
197 **al., 2013; Routh et al., 2016**). Therefore, biochemical probing suggested that ATD is an  
198 aminoacyl-tRNA deacylase with a relaxed specificity for substrate chirality, primarily due to the  
199 *trans* conformation of its active site Gly-Pro motif. It is for this reason that we named this protein  
200 ATD, which stands for Animalia-specific tRNA deacylase. ATD thus has a “gain of function” in  
201 L-chiral activity when compared to DTD due to the switch from Gly-*cis*Pro to Gly-*trans*Pro.  
202 Furthermore, biochemical data in conjunction with structural data indicate that ATD’s active site  
203 pocket, because of the “additional” space created by the inward movement of the Gly-Pro  
204 carbonyl oxygens, can accommodate only small L-amino acids like L-alanine but not the bulkier  
205 ones like L-tyrosine.

## 206 **ATD proofreads tRNA<sup>Thr</sup>(G4•U69) mischarged with L-alanine by eukaryotic AlaRS**

207 While we were in the process of identifying the physiological substrate for ATD, a recent study  
208 reported that eukaryotic AlaRS has acquired the function of L-alanine mischarging on multiple  
209 non-cognate tRNAs harboring G4•U69 wobble base pair in the acceptor stem. One of the tRNAs  
210 that undergoes significant levels of such mischarging is tRNA<sup>Thr</sup>(G4•U69) (Sun et al., 2016).  
211 This is in addition to the canonical recognition of AlaRS-specific universally occurring G3•U70  
212 in tRNA<sup>Ala</sup> (Hou and Schimmel, 1988; McClain and Foss, 1988). Interestingly, such an error  
213 in the selection of tRNAs bearing G4•U69 was found only in the case of eukaryotic AlaRS and  
214 not the bacterial one (Sun et al., 2016). In this context, therefore, eukaryotic AlaRS can be called  
215 non-discriminating AlaRS (AlaRS<sup>ND</sup>), whereas bacterial AlaRS can be referred to as  
216 discriminating AlaRS (AlaRS<sup>D</sup>). The above finding prompted us to test the role of ATD in  
217 proofreading tRNA<sup>Thr</sup>(G4•U69) selection error made by eukaryotic AlaRS<sup>ND</sup>. Strikingly,  
218 biochemical assays with MmATD showed significantly higher selectivity for the non-cognate L-  
219 Ala-tRNA<sup>Thr</sup>(G4•U69) as the enzyme acts on the substrate at just 1 nM compared to its activity  
220 on the cognate L-Thr-tRNA<sup>Thr</sup>(G4•U69) at 50 nM (Figure 4A). Thus, MmATD displays a 50-  
221 fold difference in biochemical activity on these two substrates, indicating that L-Ala-  
222 tRNA<sup>Thr</sup>(G4•U69) is the preferred substrate for ATD.

223 The other non-cognate tRNA that was found to be significantly mischarged by eukaryotic AlaRS  
224 was tRNA<sup>Cys</sup>(G4•U69) (Sun et al., 2016). We therefore checked ATD's biochemical activity on  
225 L-Ala-tRNA<sup>Cys</sup>(G4•U69) to test its role in clearing the misacylated species. It was observed that  
226 MmATD acts on the substrate at 50 nM concentration (Figure 4—figure supplement 1). Thus,  
227 a comparison of biochemical activities of MmATD on different aminoacyl-tRNA substrates  
228 suggests that L-Ala-tRNA<sup>Thr</sup>(G4•U69) is the principal substrate of ATD, whereas L-Ala-

229 tRNA<sup>Cys</sup>(G4•U69) may be partly cleared in the cellular context. The latter argument is supported  
230 by the observation that in the proteomics study of HeLa cells, misincorporation of L-alanine was  
231 observed at cysteine positions but not at threonine positions even though significant misacylation  
232 of tRNA<sup>Thr</sup>(G4•U69) with alanine was observed in *ex vivo* tRNA microarray experiments (**Sun et**  
233 **al., 2016**). Nevertheless, this observation is striking, since in humans, the enrichment of G4•U69  
234 is significantly more in tRNA<sup>Thr</sup> genes (20%) than in tRNA<sup>Cys</sup> genes (3.4%) (**Table S3**).

### 235 **ATD's biochemical activity is conserved in different organisms**

236 To rule out any organism-specific phenomenon regarding ATD's biochemical activity, we tested  
237 ATDs from multiple organisms belonging to different taxonomic groups under Chordata—  
238 human (*Homo sapiens*, HsATD) of class Mammalia (mammals), chicken (*Gallus gallus*,  
239 GgATD) of class Aves (birds), and zebrafish (*Danio rerio*, DrATD) of class Pisces (fishes). It  
240 was observed that all these ATDs can act on L-Ala-tRNA<sup>Thr</sup>(G4•U69) more efficiently than on  
241 L-Thr-tRNA<sup>Thr</sup>(G4•U69) (**Figure 4B–D**). Therefore, not only ATD's activity on the non-cognate  
242 substrate but also its ability to discriminate between L-Ala-tRNA<sup>Thr</sup>(G4•U69) and L-Thr-  
243 tRNA<sup>Thr</sup>(G4•U69) is conserved across diverse classes of Chordata. We then analyzed  
244 tRNA<sup>Thr</sup>(G4•U69) gene sequences from diverse organisms which revealed that the first five base  
245 pairs in the acceptor stem are invariant or highly conserved (**Figure 4—figure supplement 2**).  
246 As ATD belongs to the DTD-like fold, its interaction with the tRNA is not expected to go  
247 beyond the first three or four base pairs in the acceptor stem. Hence, lack of variation in the  
248 acceptor stem of tRNA<sup>Thr</sup>(G4•U69) further suggests that ATD's biochemical activity on L-Ala-  
249 tRNA<sup>Thr</sup>(G4•U69) is conserved across diverse taxonomic groups.

250 **EF-Tu protects the cognate L-Thr-tRNA<sup>Thr</sup>(G4•U69) but not the non-cognate L-Ala-**  
251 **tRNA<sup>Thr</sup>(G4•U69) from ATD**

252 Since ATD had shown significant activity on L-Thr-tRNA<sup>Thr</sup>(G4•U69), we checked whether EF-  
253 Tu can protect the cognate substrate from ATD. EF-Tu occurs abundantly in the cell and most  
254 aminoacyl-tRNAs are expected to exist in complex with EF-Tu, ready for delivery to the  
255 ribosome (Ishihama et al., 2008; Li et al., 2014). On the basis of thermodynamic compensation,  
256 EF-Tu is expected to bind the non-cognate L-Ala-tRNA<sup>Thr</sup>(G4•U69) with significantly lower  
257 affinity compared to the cognate L-Thr-tRNA<sup>Thr</sup>(G4•U69) (LaRiviere, 2001). Competition  
258 assays demonstrated that L-Ala-tRNA<sup>Thr</sup>(G4•U69) undergoes significant deacylation with 50 nM  
259 MmATD in the presence of EF-Tu (Figure 5A,B). By contrast, L-Thr-tRNA<sup>Thr</sup>(G4•U69) is  
260 completely protected by EF-Tu even at 500 nM enzyme, whereas its protection is marginally  
261 relieved at 5 μM MmATD (Figure 5C,D). Hence, the discrimination potential/factor of  
262 MmATD for these two substrates enhances from approximately 50-fold in the absence of EF-Tu  
263 to more than 100-fold in the presence of EF-Tu (Figure 4A, Figure 5B,D). The above  
264 biochemical data clearly suggest that L-Ala-tRNA<sup>Thr</sup>(G4•U69) is ATD's physiological substrate,  
265 and EF-Tu is able to confer adequate protection on the cognate substrate against ATD.

266 **L-alanine mischarging on tRNA<sup>Thr</sup>(G4•U69) by AlaRS<sup>ND</sup> and ATD have a strict and strong**  
267 **correlation**

268 To ascertain whether any correlation exists between ATD and tRNA<sup>Thr</sup>(G4•U69), we performed  
269 a thorough bioinformatics analysis. It showed that many Animalia genomes are enriched in  
270 G4•U69-containing tRNA genes of which tRNA<sup>Thr</sup>(G4•U69) genes exhibit the highest level of  
271 enrichment. The enrichment of tRNA<sup>Thr</sup>(G4•U69) genes ranges from 20% to 40% (average  
272 ~30%). Such an enrichment of tRNA<sup>Thr</sup>(G4•U69) genes is observed throughout phylum Chordata  
273 as well as in one organism (*Strongylocentrotus purpuratus*) from phylum Echinodermata whose  
274 tRNA gene sequences are available in the database. The enrichment of G4•U69 is markedly less

275 in other tRNA genes compared to tRNA<sup>Thr</sup> genes. For example, tRNA<sup>Cys</sup>(G4•U69) genes  
276 constitute only 0.69–11.9% (average ~5%) of total tRNA<sup>Cys</sup> genes (**Figure 6A,B, Table S3,**  
277 **Data 1**). Additionally, amongst all the G4•U69-containing tRNA genes found in Chordata, only  
278 tRNA<sup>Thr</sup>(G4•U69) genes occur in all those chordate species whose tRNA gene sequences are  
279 available in the database. Other tRNA genes carrying G4•U69 are restricted to only a small  
280 subset of organisms. For instance, tRNA<sup>Cys</sup>(G4•U69) genes occur in only 19 of 62 chordate  
281 species whose tRNA gene sequences are available in the database (**Figure 6C**). The above  
282 observations further indicate that L-Ala-tRNA<sup>Thr</sup>(G4•U69) constitutes the major substrate of  
283 ATD, whereas others including L-Ala-tRNA<sup>Cys</sup>(G4•U69) are only minor ones.

284 Strikingly, a survey for the presence of ATD revealed its strict association with the enrichment of  
285 tRNA<sup>Thr</sup>(G4•U69) genes (**Figure 6A,B**). Remarkably, organisms (*e.g.*, *Drosophila*  
286 *melanogaster*) that lack tRNA<sup>Thr</sup>(G4•U69) genes simultaneously lack ATD, including archaea  
287 which also seem to possess eukaryotic-type AlaRS<sup>ND</sup>. Although many bacteria possess  
288 tRNA<sup>Thr</sup>(G4•U69) genes, they lack AlaRS<sup>ND</sup> altogether and hence, the problem of L-alanine  
289 misacylation of tRNA<sup>Thr</sup>(G4•U69) does not arise at all. Thus, the problem of mischarging of  
290 tRNA<sup>Thr</sup>(G4•U69) with L-alanine arises only when tRNA<sup>Thr</sup>(G4•U69) is present alongside  
291 AlaRS<sup>ND</sup>. Such a strong as well as strict correlation between ATD and the problem of  
292 tRNA<sup>Thr</sup>(G4•U69) mis-selection by AlaRS<sup>ND</sup>, in terms of either concomitant occurrence or  
293 concomitant absence, clearly points toward a functional link between ATD and proofreading of  
294 error in tRNA<sup>Thr</sup>(G4•U69) selection.

## 295 **DISCUSSION**

296 Overall, our extensive structural and biochemical probing in combination with in-depth *in silico*  
297 analysis confirms that ATD serves as a novel and dedicated factor for correcting the  
298 tRNA<sup>Thr</sup>(G4•U69) selection error committed by eukaryotic AlaRS<sup>ND</sup> (**Figure 7**). The *trans*  
299 conformation of its active site Gly-Pro motif has led to a “gain of function” by relaxing its  
300 substrate chiral specificity. ATD thus rectifies a critical tRNA mis-selection rather than a mistake  
301 in amino acid selection by a synthetase that has been extensively studied so far in the context of  
302 proofreading (**Dock-Bregeon et al., 2000; Fersht, 1977, 1998; Fukai et al., 2000; Jakubowski**  
303 **and Fersht, 1981; Lincecum et al., 2003; Matinis and Boniecki, 2010; Nureki et al., 1998;**  
304 **Pauling, 1958; Perona and Gruic-Sovulj, 2014; Silvian et al., 1999; Yadavalli and Ibba,**  
305 **2012**). Such an error correction capability has not been attributed to any of the known editing  
306 domains, although ambiguous tRNA selection happens in several instances, wherein the  
307 ambiguity imparts selective advantage to the system (**Figure 7**) (**Schwartz and Pan, 2017;**  
308 **Shepherd and Ibba, 2014**). Besides, it also suggests that the evolutionary gain of function by  
309 AlaRS<sup>ND</sup> in charging G4•U69-bearing tRNAs with L-alanine may be advantageous, but may also  
310 require factors like ATD to keep such “errors” below precarious levels, thus avoiding global  
311 misfolding and cell death.

312 The role of ATD in Animalia to specifically prevent, minimize or regulate substitution of L-  
313 alanine for L-threonine in proteins may be crucial. It is tempting to speculate that threonine-to-  
314 alanine mutations will modulate a diverse array of phosphorylation sites on proteins, thereby  
315 causing a drastic modification of the cellular phosphoproteome. The regulatory function, if any,  
316 of ATD in generating such proteome diversity, thereby providing selective advantage to a cell or  
317 tissue type and under specific conditions such as pathogenesis or immune response, needs to be  
318 explored through up/down-regulation as well as by using knockout approaches in multiple

319 systems. It has been recently suggested that the size of tRNA limits the identity determinants  
320 required for faithful translation without cross-reacting with non-cognate synthetases (**Saint-**  
321 **Léger et al., 2016**). As has been noted in the current work, the expansion of genome size (from  
322 around 100 million base pairs in non-Chordata to >1 billion base pairs in Chordata) has led to  
323 such a cross-reactivity and enhancement in tRNA mis-selection, thereby necessitating  
324 recruitment of dedicated factors for error correction (**Figure 6B**). Identification of ATD in the  
325 present study provides the first instance of such a scenario. The advent of ATD thus marks a key  
326 event associated with the appearance of Animalia, and more specifically of Chordata about 500  
327 million years ago, to ensure translational quality control.



## 328 **Materials and Methods**

### 329 **Cloning, expression and purification**

330 The genes encoding ATDs and *M. musculus* ThrRS( $\Delta$ NTD) (residue 320–721) were PCR-  
331 amplified from respective cDNAs and inserted into pET-28b vector using restriction-free cloning  
332 (**van den Ent and Löwe, 2006**). To generate C-terminal 6X His-tagged protein, the stop codon  
333 was removed from the reverse primer. *M. musculus* full-length AlaRS gene was PCR-amplified  
334 from mouse cDNA and inserted into pET-28b vector between *NdeI* and *XhoI* sites using  
335 conventional restriction-based cloning. The recombinant proteins were overexpressed in  
336 Rosetta<sup>TM</sup>(DE3) strain of *E. coli*. Purification of His-tagged proteins (ATDs, AlaRS and ThrRS)  
337 was done using a two-step protocol, *i.e.*, Ni-NTA affinity chromatography followed by size  
338 exclusion chromatography (SEC). The storage buffer for ATDs contained 100 mM Tris (pH 8.0)  
339 and 200 mM NaCl, while that for AlaRS and ThrRS comprised 50 mM Tris (pH 8.0), 150 mM  
340 NaCl and 5 mM 2-mercaptoethanol ( $\beta$ -ME). Un-tagged MmATD was purified using cation  
341 exchange chromatography (CEC) followed by SEC. For CEC, ATD-overexpressed *E. coli* cell  
342 pellet was lysed in a buffer containing 50 mM Bis-Tris (pH 6.5) and 20 mM NaCl, and the  
343 supernatant was subjected to chromatographic separation using sulfopropyl sepharose (GE  
344 Healthcare Life Sciences, USA). The protein of interest was eluted using a NaCl gradient of 20  
345 mM to 500 mM. For SEC, Superdex 75 column (GE Healthcare Life Sciences, USA) was used.

### 346 **Crystallization of MmATD**

347 The purified un-tagged MmATD was screened for crystallization conditions using different  
348 screens (Index, Crystal Screen HT, PEG/Ion and PEGRx from Hampton Research, USA) at two  
349 different temperatures—4°C and 20°C. Mosquito Crystal (TTP LabTech, UK) crystallization

350 robot was used to set up crystallization experiments using sitting-drop vapor diffusion method by  
351 mixing 1  $\mu$ l protein and 1  $\mu$ l reservoir buffer in a 96-well MRC plate with three sub-wells  
352 (Molecular Dimensions, UK). The initial hits from the screens were further expanded for  
353 optimization using sitting-drop vapor diffusion method in 96-well format MRC plates having  
354 three sub-wells. Reservoir buffer with 0.1 M Bicine (pH 8.0) and 15% PEG1500 yielded good  
355 diffraction-quality crystals.

### 356 **X-ray diffraction data collection, structure solution and refinement**

357 In-house X-ray facility consisting of RigakuMicromax007 HF with rotating-anode generator and  
358 MAR345-dtb image plate detector was used for crystal screening and data collection at 100 K  
359 using an Oxford Cryostreamcooler (Oxford Cryosystems, UK). The wavelength of X-rays used  
360 was 1.5418 Å, corresponding to Cu K $\alpha$  radiation. HKL2000 (Otwinowski and Minor, 1997)  
361 was used for data processing and MOLREP-AUTO MR from CCP4 suite (CCP4, 1994) for  
362 molecular replacement. PfDTD (PDB id: 4NBI), with the ligand removed, was used as the search  
363 model for molecular replacement. Refinement and model building were done using  
364 REFMAC (Murshudov et al., 1997) and COOT (Emsley and Cowtan, 2004), respectively.  
365 Structure validation was done using PROCHECK (Laskowski et al., 1993). PyMOL Molecular  
366 Graphics System, Version 1.7.6.0 Schrödinger, LLC was used to generate figures. Structure-  
367 based multiple sequence alignment was carried out using the T-Coffee server in Espresso mode  
368 (<http://tcoffee.org.cat/apps/tcoffee/do:espresso>), and the corresponding figure was generated  
369 using ESPript 3.0 (<http://esript.ibcp.fr/ESPript/cgi-bin/ESPript.cgi>). The atomic coordinates of  
370 MmATD crystal structure have been deposited in the Protein Data Bank with accession code  
371 5XAQ.

### 372 ***In vitro* biochemical experiments**

373 tRNAs (*M. musculus* tRNA<sup>Gly</sup>, tRNA<sup>Ala</sup>, tRNA<sup>Thr</sup>(G4●U69) and *E. coli* tRNA<sup>Tyr</sup>) were generated  
374 by *in vitro* transcription of the corresponding tRNA genes using MEGAshortscript T7  
375 Transcription Kit (Thermo Fisher Scientific, USA). tRNAs were end-labeled with [ $\alpha$ -<sup>32</sup>P] ATP  
376 (BRIT-Jonaki, India) using CCA-adding enzyme (**Ledoux and Uhlenbeck, 2008**). Glycylation  
377 of tRNA<sup>Gly</sup> was done by incubating 1  $\mu$ M tRNA<sup>Gly</sup> with 2  $\mu$ M *Thermus thermophilus* GlyRS in a  
378 buffer containing 100 mM HEPES (pH 7.5), 10 mM KCl, 30 mM MgCl<sub>2</sub>, 50 mM glycine and 2  
379 mM ATP at 37°C for 15 min. Alanylation of tRNA<sup>Ala</sup> and tRNA<sup>Thr</sup>(G4●U69) was performed by  
380 incubating 1  $\mu$ M tRNA<sup>Ala</sup> and 10  $\mu$ M tRNA<sup>Thr</sup>(G4●U69) with 8  $\mu$ M *M. musculus* AlaRS in a  
381 solution composed of 100 mM HEPES (pH 7.5), 30 mM KCl, 100 mM MgCl<sub>2</sub>, 10 mM ATP, 10  
382 mM dithiothreitol (DTT), 1 unit/ml of PPase enzyme (Thermo Fisher Scientific, USA) and 100  
383 mM L-alanine at 37°C for 15 min. Threonylation of tRNA<sup>Thr</sup>(G4●U69) was carried out by  
384 incubating 1  $\mu$ M tRNA<sup>Thr</sup>(G4●U69) and *M. musculus* ThrRS( $\Delta$ NTD) in a buffer comprising 100  
385 mM HEPES (pH 7.5), 100 mM MgCl<sub>2</sub>, 300 mM KCl, 45 mM L-threonine, 2.5 mM DTT and 2  
386 mM ATP at 37°C for 15 min. tRNA<sup>Tyr</sup> was aminoacylated by *E. coli* TyrRS as described in  
387 **Ahmad et al., 2013**. *T. thermophilus* EF-Tu activation and protection assays were done using the  
388 protocol as described in **Routh et al., 2016**. Deacylation assays were carried out in conditions as  
389 described in **Ahmad et al., 2013** and EF-Tu rescue experiments as described in **Routh et al.,**  
390 **2016**. All the experiments were performed in triplicates, and the mean values were used to plot  
391 the graphs. Error bars denote one standard deviation from the mean of three independent  
392 readings.

### 393 **Bioinformatic analysis**

394 Protein sequences were retrieved from NCBI and were subjected to phylogenetic tree  
395 construction using the web server <http://www.phylogeny.fr/> (bootstrap number = 100) and iTOL

396 web server <http://itol.embl.de/>. tRNA gene sequences were retrieved from GtRNADB and  
397 sequences having tRNAscan-SE score >50 were used for analysis (<http://gtrnadb.ucsc.edu/>). The  
398 list of organisms whose genomes have been completely sequenced was obtained from KEGG  
399 GENOME database (<http://www.genome.jp/kegg/genome.html>). Information about genome size  
400 was taken from the web server <http://www.bionumbers.hms.harvard.edu/default.aspx>. Multiple  
401 sequence alignment of tRNA<sup>Thr</sup> and tRNA<sup>Thr</sup>(G4•U69) was prepared using T-Coffee server in M-  
402 Coffee mode (<http://tcoffee.crg.cat/apps/tcoffee/do:mcoffee>), while consensus sequence logo was  
403 prepared using WebLogo server (<http://weblogo.berkeley.edu/logo.cgi>).

#### 404 **Movie preparation**

405 The two conformations/states, one of PfDTD (initial state; PDB id: 4NBI) and the other of  
406 MmATD, were morphed using UCSF Chimera software (**Pettersen et al., 2004**). Movie was  
407 then prepared using PyMOL Molecular Graphics System, Version 1.7.6.0 Schrödinger, LLC.

408

409 **Acknowledgements**

410 The authors acknowledge Dr. P. Chandra Shekar for kindly providing mouse cDNA. S.K.K.  
411 thanks DST-INSPIRE, India, for research fellowship. M.M. thanks Department of  
412 Biotechnology, India for research fellowship. S.B.R. and R.S. acknowledge funding from 12th  
413 Five Year Plan Project BSC0113 of CSIR, India. R.S. also acknowledges funding from J.C. Bose  
414 Fellowship of SERB, India, and Centre of Excellence Project of Department of Biotechnology,  
415 India.

416

417 **Competing interests**

418 The authors declare that no competing interests exist.

419

## 420 **References**

- 421 Agmon I, Amit M, Auerbach T, Bashan A, Baram D, Bartels H, Berisio R, Greenberg I, Harms  
422 J, Hansen HA, Kessler M, Pyetan E, Schluenzen F, Sittner A, Yonath A, Zarivach R. 2004.  
423 Ribosomal crystallography: a flexible nucleotide anchoring tRNA translocation, facilitates  
424 peptide-bond formation, chirality discrimination and antibiotics synergism. *FEBS Lett* **567**:20–  
425 26. doi: 10.1016/j.febslet.2004.03.065. PMID: 15165888.
- 426 Ahmad S, Muthukumar S, Kuncha SK, Routh SB, Yerabham AS, Hussain T, Kamarthapu V,  
427 Kruparani SP, Sankaranarayanan R. 2015. Specificity and catalysis hardwired at the RNA–  
428 protein interface in a translational proofreading enzyme. *Nat Commun* **6**:7552. doi:  
429 10.1038/ncomms8552. PMID: 26113036.
- 430 Ahmad S, Routh SB, Kamarthapu V, Chalissery J, Muthukumar S, Hussain T, Kruparani SP,  
431 Deshmukh MV, Sankaranarayanan R. 2013. Mechanism of chiral proofreading during translation  
432 of the genetic code. *Elife* **2**:01519. doi: 10.7554/eLife.01519. PMID: 24302572.
- 433 Bacher JM, de Crécy-Lagard V, Schimmel PR. 2005. Inhibited cell growth and protein  
434 functional changes from an editing-defective tRNA synthetase. *Proc Natl Acad Sci USA*  
435 **102**:1697–1701. doi: 10.1073/pnas.0409064102. PMID: 15647356.
- 436 Ban N, Nissen P, Hansen J, Moore PB, Steitz TA. 2000. The complete atomic structure of the  
437 large ribosomal subunit at 2.4 Å resolution. *Science* **289**:905–920. PMID: 10937989.
- 438 Bhuta A, Quiggle K, Ott T, Ringer D, Chladek S. 1981. Stereochemical control of ribosomal  
439 peptidyltransferase reaction. Role of amino acid side-chain orientation of acceptor substrate.  
440 *Biochemistry* **20**:8–15. PMID: 7008835.

- 441 Brandman O, Hegde RS. 2016. Ribosome-associated protein quality control. *Nat Struct Mol Biol*  
442 **23**:7–15. doi: 10.1038/nsmb.3147. PMID: 26733220.
- 443 Bullwinkle TJ, Ibba M. 2016. Translation quality control is critical for bacterial responses to  
444 amino acid stress. *Proc Natl Acad Sci USA* **113**:2252–2257. doi: 10.1073/pnas.1525206113.  
445 PMID: 26858451.
- 446 Bullwinkle T, Lazazzera B, Ibba M. 2014. Quality control and infiltration of translation by  
447 amino acids outside of the genetic code. *Annu Rev Genet* **48**:149–166. doi: 10.1146/annurev-  
448 genet-120213-092101. PMID: 25195507.
- 449 Bullwinkle TJ, Reynolds NM, Raina M, Moghal A, Matsa E, Rajkovic A, Kayadibi H, Fazlollahi  
450 F, Ryan C, Howitz N, Faull KF, Lazazzera BA, Ibba M. 2014. Oxidation of cellular amino acid  
451 pools leads to cytotoxic mistranslation of the genetic code. *Elife* **3**:e02501. doi:  
452 10.7554/eLife.02501. PMID: 24891238.
- 453 Calendar R, Berg P. 1967. D-Tyrosyl RNA: formation, hydrolysis and utilization for protein  
454 synthesis. *J Mol Biol* **26**:39–54. doi: 10.1016/0022-2836(67)90259-8. PMID: 4292198.
- 455 CCP4. 1994. The CCP4 suite: programs for protein crystallography. *Acta Crystallogr D Biol*  
456 *Crystallogr* **50**:760–763. doi: 10.1107/S09074444994003112. PMID: 15299374.
- 457 Dock-Bregeon A, Sankaranarayanan R, Romby P, Caillet J, Springer M, Rees B, Francklyn  
458 CS, Ehresmann C, Moras D. 2000. Transfer RNA-mediated editing in threonyl-tRNA  
459 synthetase: The class II solution to the double discrimination problem. *Cell* **103**:877–884. PMID:  
460 11136973.



- 461 Dwivedi S, Kruparani SP, Sankaranarayanan R. 2005. A D-amino acid editing module coupled  
462 to the translational apparatus in archaea. *Nat Struct Mol Biol* **12**:556–557. doi: 10.1038/nsmb943.  
463 PMID: 15908961.
- 464 Emsley P, Cowtan K. 2004. Coot: model-building tools for molecular graphics. *Acta Crystallogr*  
465 *D Biol Crystallogr* **60**:2126–2132. doi: 10.1107/S0907444904019158. PMID: 15572765.
- 466 Englander MT, Avins JL, Fleisher RC, Liu B, Effraim PR, Wang J, Schulten K, Leyh TS,  
467 Gonzalez Jr RL, Cornish VW. 2015. The ribosome can discriminate the chirality of amino acids  
468 within its peptidyl-transferase center. *Proc Natl Acad Sci USA* **112**:6038–6043. doi:  
469 10.1073/pnas.1424712112. PMID: 25918365.
- 470 Fan E, Baker D, Fields S, Gelb MH, Buckner FS, Van Voorhis WC, Phizicky E, Dumont M,  
471 Mehlin C, Grayhack E, Sullivan M, Verlinde C, Detitta G, Meldrum DR, Merritt EA, Earnest T,  
472 Soltis M, Zucker F, Myler PJ, Schoenfeld L, Kim D, Worthey L, Lacount D, Vignali M, Li J,  
473 Mondal S, Massey A, Carroll B, Gulde S, Luft J, Desoto L, Holl M, Caruthers J, Bosch J, Robien  
474 M, Arakaki T, Holmes M, Le Trong I, Hol WG. 2008. Structural genomics of pathogenic  
475 protozoa: an overview. *Methods Mol Biol* **426**:497–513. doi: 10.1007/978-1-60327-058-8\_33.  
476 PMID: 18542886.
- 477 Ferri-Fioni ML, Fromant M, Bouin AP, Aubard C, Lazennec C, Plateau P, Blanquet S. 2006.  
478 Identification in archaea of a novel D-Tyr-tRNA<sup>Tyr</sup> deacylase. *J Biol Chem* **281**:27575–27585.  
479 doi: 10.1074/jbc.M605860200. PMID: 16844682.
- 480 Ferri-Fioni ML, Schmitt E, Soutourina J, Plateau P, Mechulam Y, Blanquet S. 2001. Structure of  
481 crystalline D-Tyr-tRNA<sup>Tyr</sup> deacylase. A representative of a new class of tRNA-dependent  
482 hydrolases. *J Biol Chem* **276**:47285–47290. doi: 10.1074/jbc.M106550200. PMID: 11568181.

- 483 Fersht AR. Enzyme Structure and Mechanism. New York, NY: W.H. Freeman and Company  
484 (1977).
- 485 Fersht AR. 1998. Sieves in sequence. *Science* **280**:541. PMID: 9575099.
- 486 Fukai S, Nureki O, Sekine S, Shimada A, Tao J, Vassilyev DG, Yokoyama S. 2000. Structural  
487 basis for double-sieve discrimination of L-valine from L-isoleucine and L-threonine by the  
488 complex of tRNA<sup>Val</sup> and valyl-tRNA synthetase. *Cell* **103**:793–803. PMID: 11114335.
- 489 Gomes AC, Miranda I, Silva RM, Moura GR, Thomas B, Akoulitchev A, Santos MA. 2007. A  
490 genetic code alteration generates a proteome of high diversity in the human pathogen *Candida*  
491 *albicans*. *Genome Biol* **8**:R206. doi: 10.1186/gb-2007-8-10-r206. PMID: 17916231.
- 492 Guo M, Schimmel P. 2012. Structural analyses clarify the complex control of mistranslation by  
493 tRNA synthetases. *Curr Opin Struct Biol* **22**:119–126. doi: 10.1016/j.sbi.2011.11.008. PMID:  
494 22155179.
- 495 Hou YM, Schimmel P. 1988. A simple structural feature is a major determinant of the identity of  
496 a transfer RNA. *Nature* **333**:140–145. doi: 10.1038/333140a0. PMID: 3285220.
- 497 Hussain T, Kamarthapu V, Kruparani SP, Deshmukh MV, Sankaranarayanan R. 2010.  
498 Mechanistic insights into cognate substrate discrimination during proofreading in translation.  
499 *Proc Natl Acad Sci USA* **107**:22117–22121. doi: 10.1073/pnas.1014299107. PMID: 21098258.
- 500 Hussain T, Kruparani SP, Pal B, Dock-Bregeon AC, Dwivedi S, Shekar MR, Sureshbabu K,  
501 Sankaranarayanan R. 2006. Post-transfer editing mechanism of a D-aminoacyl-tRNA deacylase-  
502 like domain in threonyl-tRNA synthetase from archaea. *EMBO J* **25**:4152–4162. doi:  
503 10.1038/sj.emboj.7601278. PMID: 16902403.

- 504 Ibba M, Söll D. 2000. Aminoacyl-tRNA synthesis. *Annu Rev Biochem* **69**:617–650. doi:  
505 10.1146/annurev.biochem.69.1.617. PMID: 10966471.
- 506 Ishihama Y, Schmidt T, Rappsilber J, Mann M, Hartl FU, Kerner MJ, Frishman D. 2008. Protein  
507 abundance profiling of the *Escherichia coli* cytosol. *BMC Genomics* **9**:102. doi: 10.1186/1471-  
508 2164-9-102. PMID: 18304323.
- 509 Jakubowski H, Fersht AR. 1981. Alternative pathways for editing non-cognate amino acids by  
510 aminoacyl-tRNA synthetases. *Nucleic Acids Res* **9**:3105–3117. PMID: 7024910.
- 511 Jonak J, Smrt J, Holy A, Rychlik I. 1980. Interaction of *Escherichia coli* EF-Tu.GTP and EF-  
512 Tu.GDP with analogues of the 3' terminus of aminoacyl-tRNA. *Eur J Biochem* **105**:315–320.  
513 PMID: 6991255.
- 514 Karkhanis VA, Mascarenhas AP, Martinis SA. 2007. Amino acid toxicities of *Escherichia coli*  
515 that are prevented by leucyl-tRNA synthetase amino acid editing. *J Bacteriol* **189**:8765–8768.  
516 doi: 10.1128/JB.01215-07. PMID: 17890314.
- 517 Kermgard E, Yang Z, Michel AM, Simari R, Wong J, Ibba M and Lazazzera BA. 2017. Quality  
518 control by isoleucyl-tRNA synthetase of *Bacillus subtilis* is required for efficient sporulation. *Sci*  
519 *Rep* **7**:41763. doi: 10.1038/srep41763. PMID: 28139725.
- 520 Korencic D, Ahel I, Schelert J, Sacher M, Ruan B, Stathopoulos C, Blum P, Ibba M, Söll D.  
521 2004. A freestanding proofreading domain is required for protein synthesis quality control in  
522 Archaea. *Proc Natl Acad Sci USA* **101**:10260–10265. doi: 10.1073/pnas.0403926101. PMID:  
523 15240874.

- 524 LaRiviere FJ, Wolfson AD, Uhlenbeck OC. 2001. Uniform binding of aminoacyl-tRNAs to  
525 elongation factor Tu by thermodynamic compensation. *Science* **294**:165–168. doi:  
526 10.1126/science.1064242. PMID: 11588263.
- 527 Laskowski RA, MacArthur MW, Moss DS, Thornton JM. 1993. PROCHECK: a program to  
528 check the stereochemical quality of protein structures. *J Appl Crystallogr* **26**:283–291. doi:  
529 10.1107/S0021889892009944.
- 530 Ledoux S, Uhlenbeck OC, 2008. [3'-<sup>32</sup>P]-labeling tRNA with nucleotidyltransferase for assaying  
531 aminoacylation and peptide bond formation. *Methods* **44**:74–80. doi:  
532 10.1016/j.ymeth.2007.08.001. PMID: 18241789.
- 533 Lee JW, Beebe K, Nangle LA, Jang J, Longo-Guess CM, Cook SA, Davisson MT, Sundberg JP,  
534 Schimmel P, Ackerman SL. 2006. Editing-defective tRNA synthetase causes protein misfolding  
535 and neurodegeneration. *Nature* **443**:50–55. doi: 10.1038/nature05096. PMID: 16906134.
- 536 Li GW, Burkhardt D, Gross C, Weissman JS. 2014. Quantifying absolute protein synthesis rates  
537 reveals principles underlying allocation of cellular responses. *Cell* **157**:624–635. doi:  
538 10.1016/j.cell.2014.02.033. PMID: 24766808.
- 539 Lincecum Jr TL, Tukalo M, Yaremchuk A, Mursinna RS, Williams AM, Sproat BS, Van Den  
540 Eynde W, Link A, Van Calenbergh S, Grøtli M, Martinis SA, Cusack S. 2003. Structural and  
541 mechanistic basis of pre- and posttransfer editing by leucyl-tRNA synthetase. *Mol Cell* **11**:951–  
542 963. PMID: 12718881.
- 543 Ling J, Reynolds N, Ibba M. 2009. Aminoacyl-tRNA synthesis and translational quality control.  
544 *Annu Rev Microbiol* **63**:61–78. doi: 10.1146/annurev.micro.091208.073210. PMID: 19379069.

- 545 Liu Y, Satz JS, Vo MN, Nangle LA, Schimmel P, Ackerman SL. 2014. Deficiencies in tRNA  
546 synthetase editing activity cause cardioproteinopathy. *Proc Natl Acad Sci USA* **111**:17570–  
547 17575. doi: 10.1073/pnas.1420196111. PMID: 25422440.
- 548 Loftfield RB, Vanderjagt D. 1972. The frequency of errors in protein biosynthesis. *Biochem J*  
549 **128**:1353–1356. PMID: 4643706.
- 550 Lu J, Bergert M, Walther A, Suter B. 2014. Double-sieving-defective aminoacyl-tRNA  
551 synthetase causes protein mistranslation and affects cellular physiology and development. *Nat*  
552 *Commun* **5**:5650. doi: 10.1038/ncomms6650. PMID: 25427601.
- 553 Martinis SA, Boniecki MT. 2010. The balance between pre- and post-transfer editing in tRNA  
554 synthetases. *FEBS Lett* **584**:455–459. doi: 10.1016/j.febslet.2009.11.071. PMID: 19941860.
- 555 McClain WH, Foss K. 1988. Changing the acceptor identity of a transfer RNA by altering  
556 nucleotides in a “variable pocket”. *Science* **241**:1804–1807. doi:10.1126/science.2459773.  
557 PMID: 2459773.
- 558 Moghal A, Hwang L, Faull K, Ibba M. 2016. Multiple quality control pathways limit non-protein  
559 amino acid use by yeast cytoplasmic phenylalanyl-tRNA synthetase. *J Biol Chem* **291**:15796–  
560 805. doi: 10.1074/jbc.M116.726828. PMID: 27226603.
- 561 Moghal A, Mohler K, Ibba M. 2014. Mistranslation of the genetic code. *FEBS Lett* **588**:4305–  
562 4310. doi: 10.1016/j.febslet.2014.08.035. PMID: 25220850.
- 563 Mohler K, Mann R, Bullwinkle TJ, Hopkins K, Hwang L, Reynolds NM, Gassaway B, Aerni  
564 HR, Rinehart J, Polymenis M, Faull K, Ibba M. 2017. Editing of misaminoacylated tRNA

- 565 controls the sensitivity of amino acid stress responses in *Saccharomyces cerevisiae*. *Nucleic*  
566 *Acids Res* **45**:3985–3996. doi: 10.1093/nar/gkx077. PMID: 28168297.
- 567 Murshudov GN, Vagin AA, Dodson EJ. 1997. Refinement of macromolecular structures by the  
568 maximum-likelihood method. *Acta Crystallogr D Biol Crystallogr* **53**:240–255. doi:  
569 10.1107/S09074444996012255. PMID: 15299926.
- 570 Nangle LA, de Crécy Lagard V, Döring V, Schimmel P. 2002. Genetic code ambiguity. Cell  
571 viability related to the severity of editing defects in mutant tRNA synthetases. *J Biol Chem*  
572 **277**:45729–45733. doi: 10.1074/jbc.M208093200. PMID: 12244062.
- 573 Netzer N, Goodenbour JM, David A, Dittmar KA, Jones RB, Schneider JR, Boone D, Eves EM,  
574 Rosner MR, Gibbs JS, Embry A, Dolan B, Das S, Hickman HD, Berglund P, Bennink JR,  
575 Yewdell JW, Pan T. 2009. Innate immune and chemically triggered oxidative stress modifies  
576 translational fidelity. *Nature* **462**:522–526. doi: 10.1038/nature08576. PMID: 19940929.
- 577 Nureki O, Vassylyev DG, Tateno M, Shimada A, Nakama T, Fukai S, Konno M, Hendrickson  
578 TL, Schimmel P, Yokoyama S. 1998. Enzyme structure with two catalytic sites for double-sieve  
579 selection of substrate. *Science* **280**:578–582. PMID: 9554847.
- 580 Ogle JM, Ramakrishnan V. 2005. Structural insights into translational fidelity. *Annu Rev*  
581 *Biochem* **74**:129–177. doi: 10.1146/annurev.biochem.74.061903.155440. PMID: 15952884.
- 582 Otwinowski Z, Minor W. “Processing of X-ray diffraction data collected in oscillation mode” in  
583 *Methods in Enzymology, Macromolecular Crystallography, Part A*, C. Carter Jr., R. Sweet, Eds.  
584 (Elsevier, 1997), 1st ed., vol. 276, pp. 307–326.

- 585 Pauling L. “[The probability of errors in the process of synthesis of protein molecules]” in  
586 *Arbeiten aus dem Gebiet der Naturstoffe* (Birkhäuser Verlag, Basel, 1958), pp. 597–602.
- 587 Pawar KI, Suma K, Seenivasan A, Kuncha SK, Routh SB, Kruparani SP, Sankaranarayanan R.  
588 2017. Role of D-aminoacyl-tRNA deacylase beyond chiral proofreading as a cellular defense  
589 against glycine mischarging by AlaRS. *Elife* **6**:e24001. doi: 10.7554/eLife.24001. PMID:  
590 28362257.
- 591 Perona JJ, Gruic-Sovulj I. 2014. Synthetic and editing mechanisms of aminoacyl-tRNA  
592 synthetases. *Top Curr Chem* **344**:1–41. doi: 10.1007/128\_2013\_456. PMID: 23852030.
- 593 Pettersen EF, Goddard TD, Huang CC, Couch GS, Greenblatt DM, Meng EC, Ferrin TE. 2004.  
594 UCSF Chimera—a visualization system for exploratory research and analysis. *J Comput Chem*  
595 **25**:1605–1612. doi: 10.1002/jcc.20084. PMID: 15264254.
- 596 Pingoud A, Urbanke C. 1980. Aminoacyl transfer ribonucleic acid binding site of the bacterial  
597 elongation factor Tu. *Biochemistry* **19**:2108–2112. PMID: 6990972.
- 598 Ribas de Pouplana L, Santos MA, Zhu JH, Farabaugh PJ, Javid B. 2014. Protein mistranslation:  
599 friend or foe? *Trends Biochem Sci* **39**:355–362. doi: 10.1016/j.tibs.2014.06.002. PMID:  
600 25023410.
- 601 Rodnina MV. 2016. The ribosome in action: Tuning of translational efficiency and protein  
602 folding. *Protein Sci* **25**:1390–1406. doi: 10.1002/pro.2950. PMID: 27198711.
- 603 Rodnina MV, Wintermeyer W. 2016. Protein elongation, co-translational folding and targeting. *J*  
604 *Mol Biol* **428**:2165–2185. doi: 10.1016/j.jmb.2016.03.022. PMID: 27038507.

605 Routh SB, Pawar KI, Ahmad S, Singh S, Suma K, Kumar M, Kuncha SK, Yadav K, Kruparani  
606 SP, Sankaranarayanan R. 2016. Elongation factor Tu prevents misediting of Gly-tRNA(Gly)  
607 caused by the design behind the chiral proofreading site of D-aminoacyl-tRNA deacylase. *PLoS*  
608 *Biol* **14**:e1002465. doi: 10.1371/journal.pbio.1002465. PMID: 27224426.

609 Roy H, Ling J, Irnov M, Ibba M. 2004. Post-transfer editing *in vitro* and *in vivo* by the  $\beta$  subunit  
610 of phenylalanyl-tRNA synthetase. *EMBO J* **23**:4639–4648. doi: 10.1038/sj.emboj.7600474.  
611 PMID: 15526031.

612 Saint-Léger A, Bello C, Dans PD, Torres AG, Novoa EM, Camacho N, Orozco M, Kondrashov  
613 FA, Ribas de Pouplana L. 2016. Saturation of recognition elements blocks evolution of new  
614 tRNA identities. *Sci Adv* **2**:e1501860. doi: 10.1126/sciadv.1501860. PMID: 27386510.

615 Schwartz MH, Pan T. 2016. Temperature dependent mistranslation in a hyperthermophile adapts  
616 proteins to lower temperatures. *Nucleic Acids Res* **44**:294–303. doi: 10.1093/nar/gkv1379.  
617 PMID: 26657639.

618 Schwartz MH, Pan T. 2017. Function and origin of mistranslation in distinct cellular contexts.  
619 *Crit Rev Biochem Mol Biol* **52**:205–219. doi: 10.1080/10409238.2016.1274284. PMID:  
620 28075177.

621 Schwartz MH, Waldbauer JR, Zhang L, Pan T. 2016. Global tRNA misacylation induced by  
622 anaerobiosis and antibiotic exposure broadly increases stress resistance in *Escherichia coli*.  
623 *Nucleic Acids Res* **21**:10292–303. doi: 10.1093/nar/gkw856. PMID: 27672035.

624 Shepherd J, Ibba M. 2014. Relaxed substrate specificity leads to extensive tRNA mischarging by  
625 *Streptococcus pneumoniae* class I and class II aminoacyl-tRNA synthetases. *MBio* **5**:e01656-14.  
626 doi: 10.1128/mBio.01656-14. PMID: 25205097.



- 627 Sheppard K, Yuan J, Hohn MJ, Jester B, Devine KM, Söll D. 2008. From one amino acid to  
628 another: tRNA-dependent amino acid biosynthesis. *Nucleic Acids Res* **36**:1813–1825. doi:  
629 10.1093/nar/gkn015. PMID: 18252769.
- 630 Silvian LF, Wang J, Steitz TA. 1999. Insights into editing from an Ile-tRNA synthetase structure  
631 with tRNA<sup>Ile</sup> and mupirocin. *Science* **285**:1074–1077. PMID: 10446055.
- 632 Simms CL, Thomas EN, Zaher HS. 2017. Ribosome-based quality control of mRNA and nascent  
633 peptides. *Wiley Interdiscip Rev RNA* **8**:e1366. doi: 10.1002/wrna.1366. PMID: 27193249.
- 634 Soutourina J, Plateau P, Delort F, Peirotes A, Blanquet S. 1999. Functional characterization of  
635 the D-Tyr-tRNA<sup>Tyr</sup> deacylase from *Escherichia coli*. *J Biol Chem* **274**:19109–19114. doi:  
636 10.1074/jbc.274.27.19109. PMID: 10383414.
- 637 Sun L, Gomes AC, He W, Zhou H, Wang X, Pan DW, Schimmel P, Pan T, Yang XL. 2016.  
638 Evolutionary gain of alanine mischarging to noncognate tRNAs with a G4:U69 base pair. *J Am*  
639 *Chem Soc* **138**:12948–12955. doi: 10.1021/jacs.6b07121. PMID: 27622773.
- 640 van den Ent F, Löwe J. 2006. RF cloning: a restriction-free method for inserting target genes into  
641 plasmids. *J Biochem Biophys Methods* **67**:67–74. doi: 10.1016/j.jbbm.2005.12.008. PMID:  
642 16480772.
- 643 Wydau S, van der Rest G, Aubard C, Plateau P, Blanquet S, 2009. Widespread distribution of  
644 cell defense against D-aminoacyl-tRNAs. *J Biol Chem* **284**:14096–14104. doi:  
645 10.1074/jbc.M808173200. PMID: 19332551.

- 646 Yadavalli SS, Ibba M. 2012. Quality control in aminoacyl-tRNA synthesis: its role in  
647 translational fidelity. *Adv Protein Chem Struct Biol* **86**:1–43. doi: 10.1016/B978-0-12-386497-  
648 0.00001-3. PMID: 22243580.
- 649 Yamane T, Miller DL, Hopfield JJ. 1981. Discrimination between D- and L-tyrosyl transfer  
650 ribonucleic acids in peptide chain elongation. *Biochemistry* **20**:7059–7064. PMID: 7032588

651 **Figures**

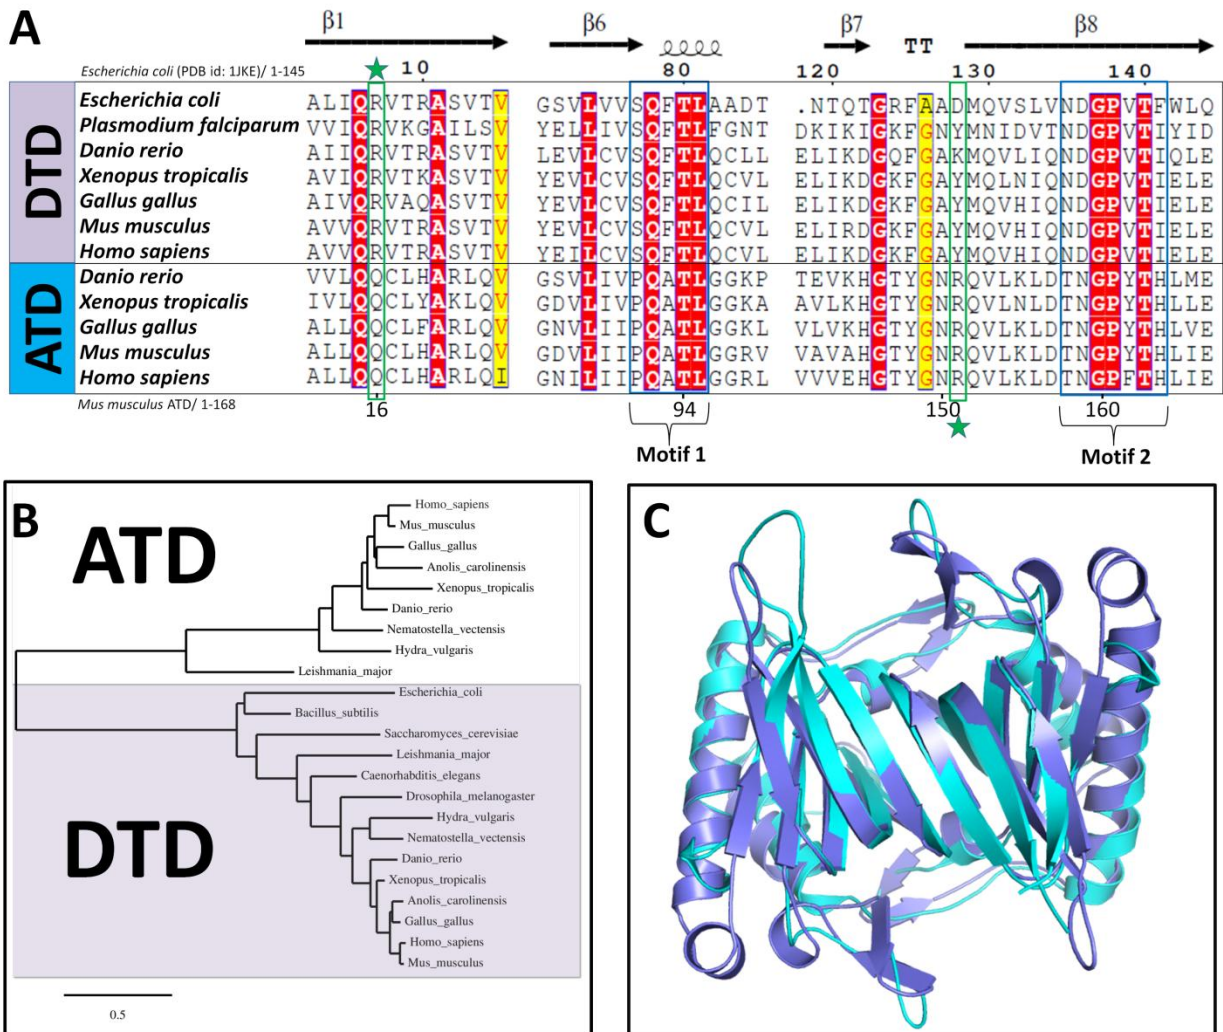

652

653 **Figure 1. ATD is a variant of DTD.** (A) Multiple sequence alignment showing similar but  
 654 distinct and characteristic sequence motifs in DTD and ATD (motifs 1 and 2). The highly  
 655 conserved arginine in DTD (Arg7, EcDTD) is indicated by a star above, whereas the invariant  
 656 arginine in ATD (Arg151, MmATD) is highlighted by a star below. (B) Phylogenetic  
 657 classification of DTD and ATD showing their grouping into two separate categories. (C) Crystal  
 658 structure of MmATD homodimer (blue) superimposed on that of PfDTD homodimer (cyan; PDB  
 659 id: 4NBI).

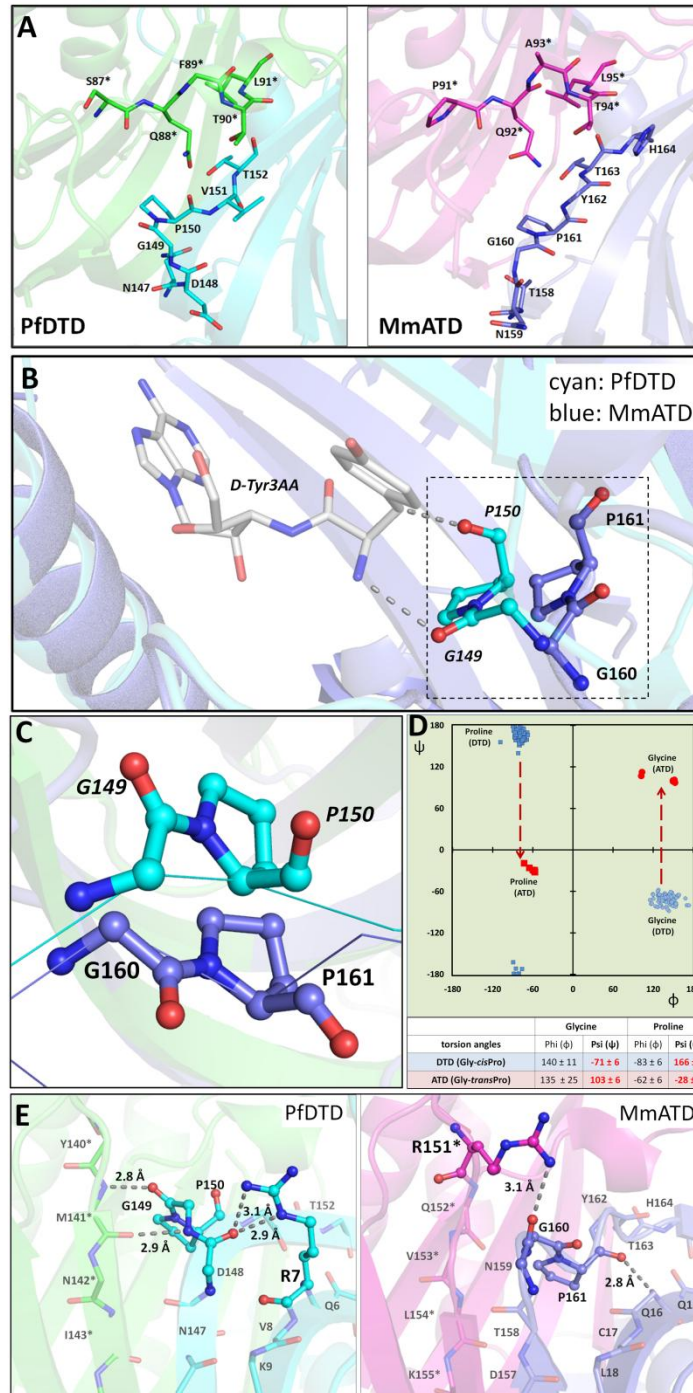

660

661 **Figure 2. ATD has distinct active site elements/features as compared to DTD's.** (A) Crystal  
 662 structures of PfDTD (PDB id: 4NBI) and MmATD showing that motifs 1 and 2 form the active  
 663 site at the dimeric interface in both. (B) Comparison between Gly-transPro motif in MmATD  
 664 and Gly-cisPro motif in PfDTD (PDB id: 4NBI) after structural superposition of the two

665 proteins. **(C)** The comparison shown in **(B)** depicted from a different angle, highlighting the  
666 opposite orientation of Gly-Pro carbonyl oxygens of the two proteins. **(D)** Ramachandran plot of  
667 glycine and proline residues of the Gly-Pro motif of all the available crystal structures of DTD  
668 (blue) and ATD (red), highlighting the change of  $\sim 180^\circ$  in the  $\psi$  torsion angle. **(E)** Interaction of  
669 the side chain of Arg7 with the Gly-*cis*Pro motif of the same monomer in PfDTD (PDB id:  
670 4NBI), and of the side chain of Arg151 with the Gly-*trans*Pro motif of the dimeric counterpart in  
671 MmATD. Residues from the dimeric counterpart are indicated by \*.

672

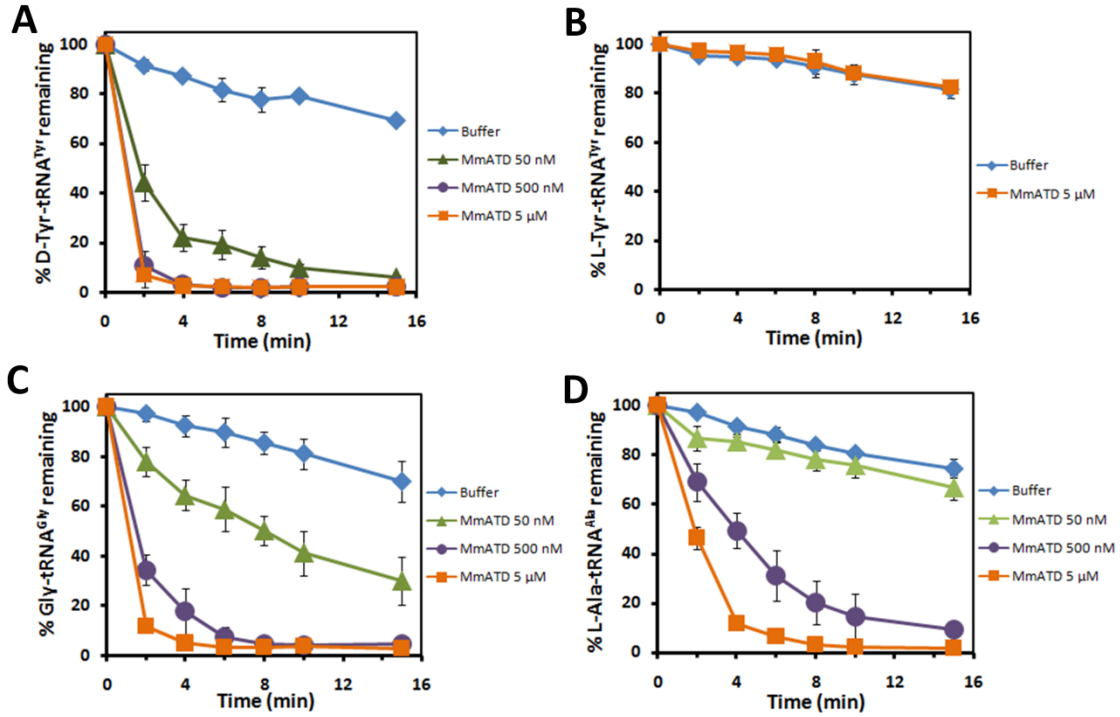

673

674 **Figure 3. ATD displays relaxation of substrate chiral specificity. (A–D)** Deacylation of D-  
675 Tyr-tRNA<sup>Tyr</sup>, L-Tyr-tRNA<sup>Tyr</sup>, Gly-tRNA<sup>Gly</sup> and L-Ala-tRNA<sup>Ala</sup> by different concentrations of  
676 MmATD. Error bars denote one standard deviation from the mean of three independent readings.

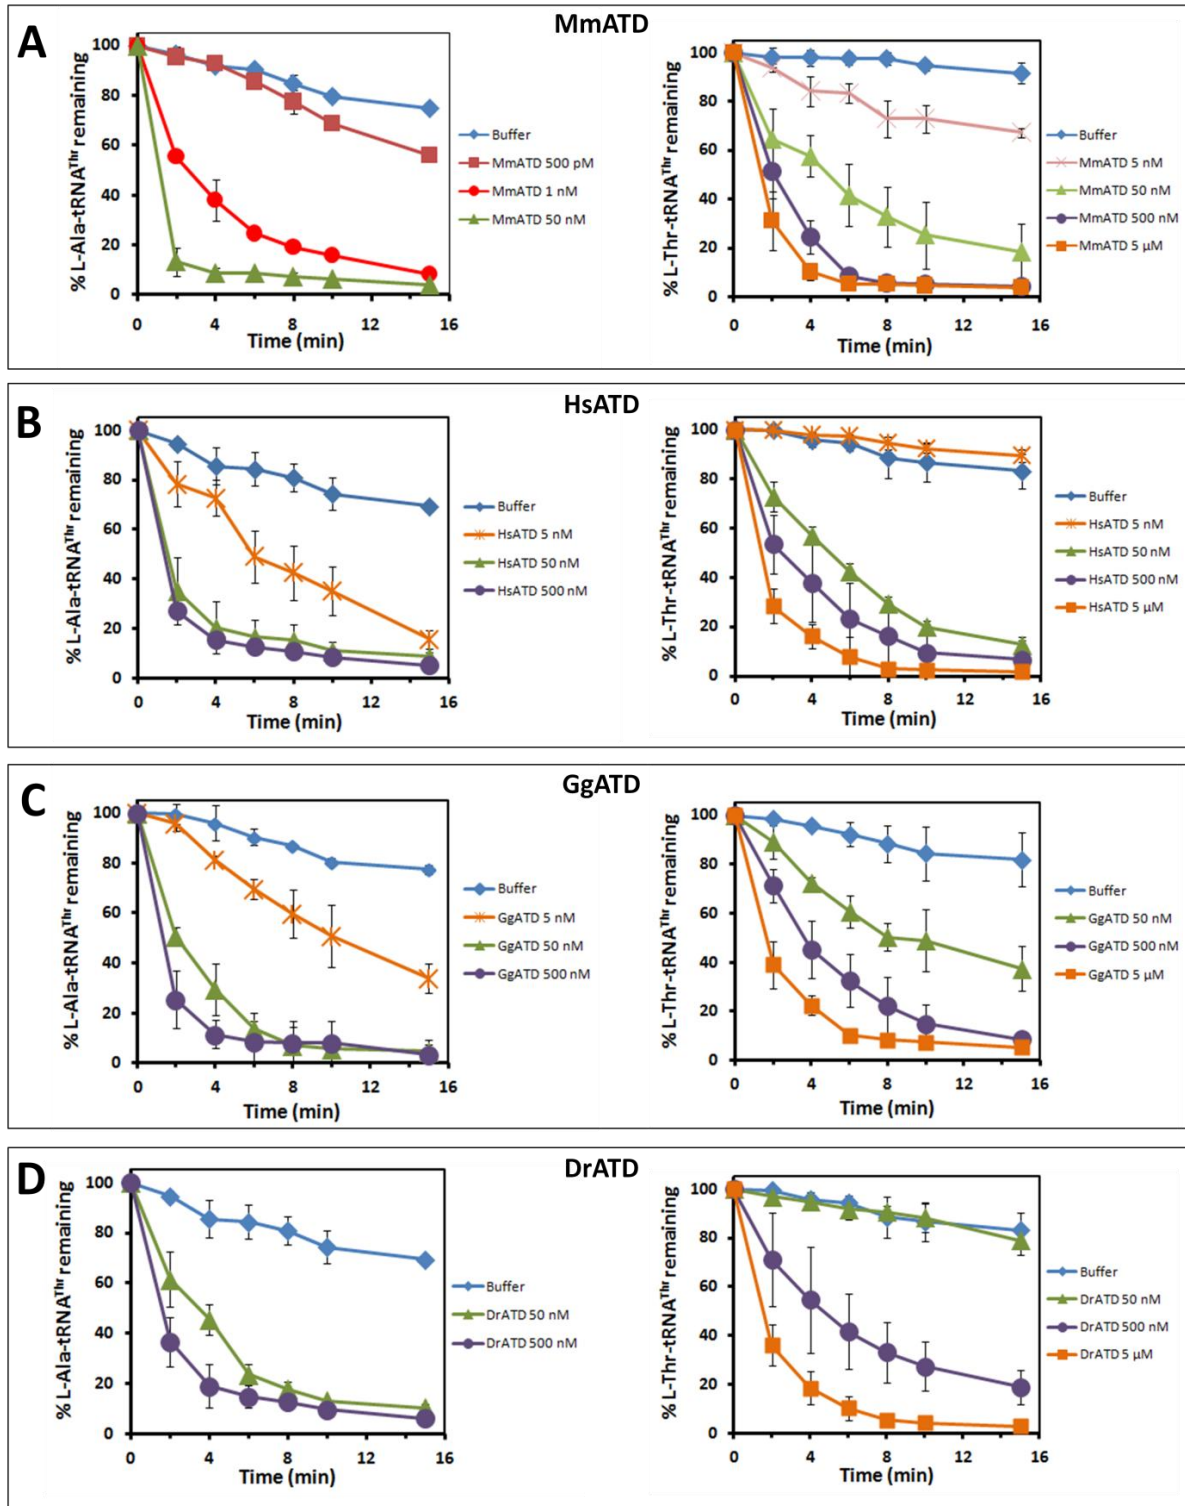

677

678 **Figure 4. Proofreading of L-Ala-tRNA<sup>Thr</sup>(G4•U69) by ATD is conserved across organisms.**

679 Deacylation of L-Ala-tRNA<sup>Thr</sup>(G4•U69) and L-Thr-tRNA<sup>Thr</sup>(G4•U69) by different

680 concentrations of **(A)** MmATD, **(B)** HsATD, **(C)** GgATD, and **(D)** DrATD. Error bars denote  
681 one standard deviation from the mean of three independent readings.

682



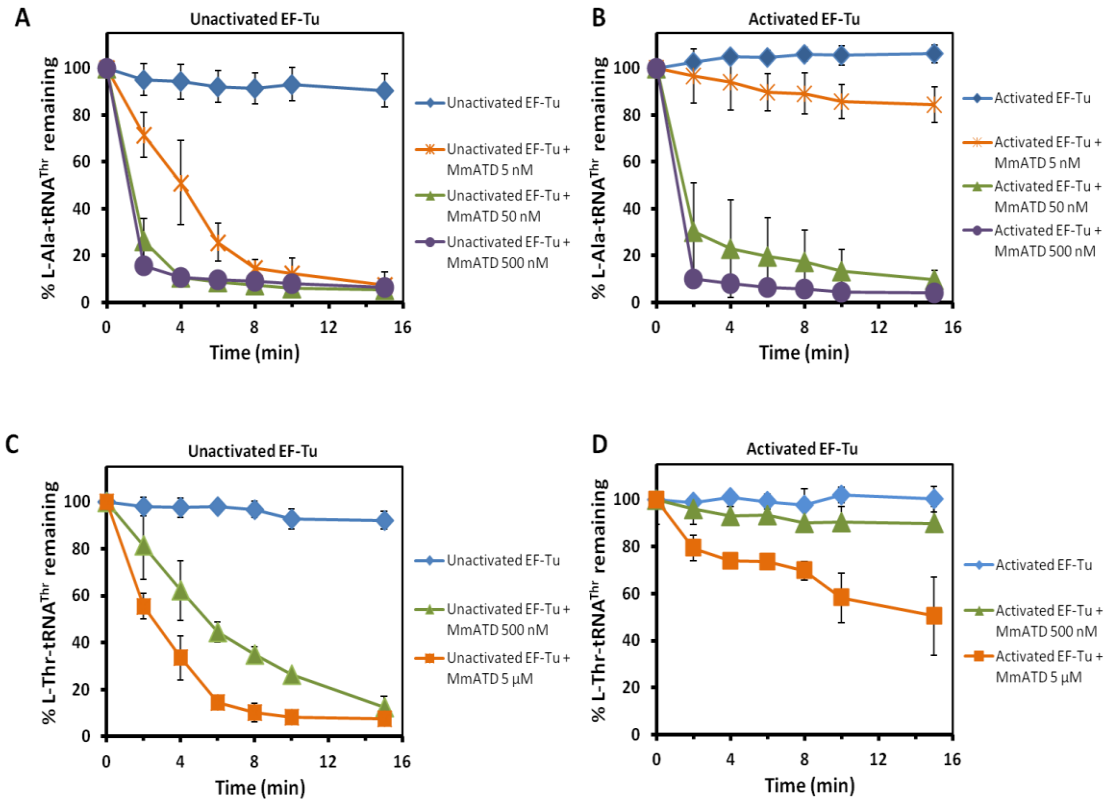

683

684 **Figure 5. EF-Tu does not confer protection on the non-cognate L-Ala-tRNA<sup>Thr</sup>(G4•U69)**  
685 **against ATD.** Deacylation of L-Ala-tRNA<sup>Thr</sup>(G4•U69) by different concentrations of MmATD  
686 in the presence of (A) unactivated EF-Tu, and (B) activated EF-Tu. Deacylation of L-Thr-  
687 tRNA<sup>Thr</sup>(G4•U69) by different concentrations of MmATD in the presence of (C) unactivated EF-  
688 Tu, and (D) activated EF-Tu. Error bars denote one standard deviation from the mean of three  
689 independent readings.

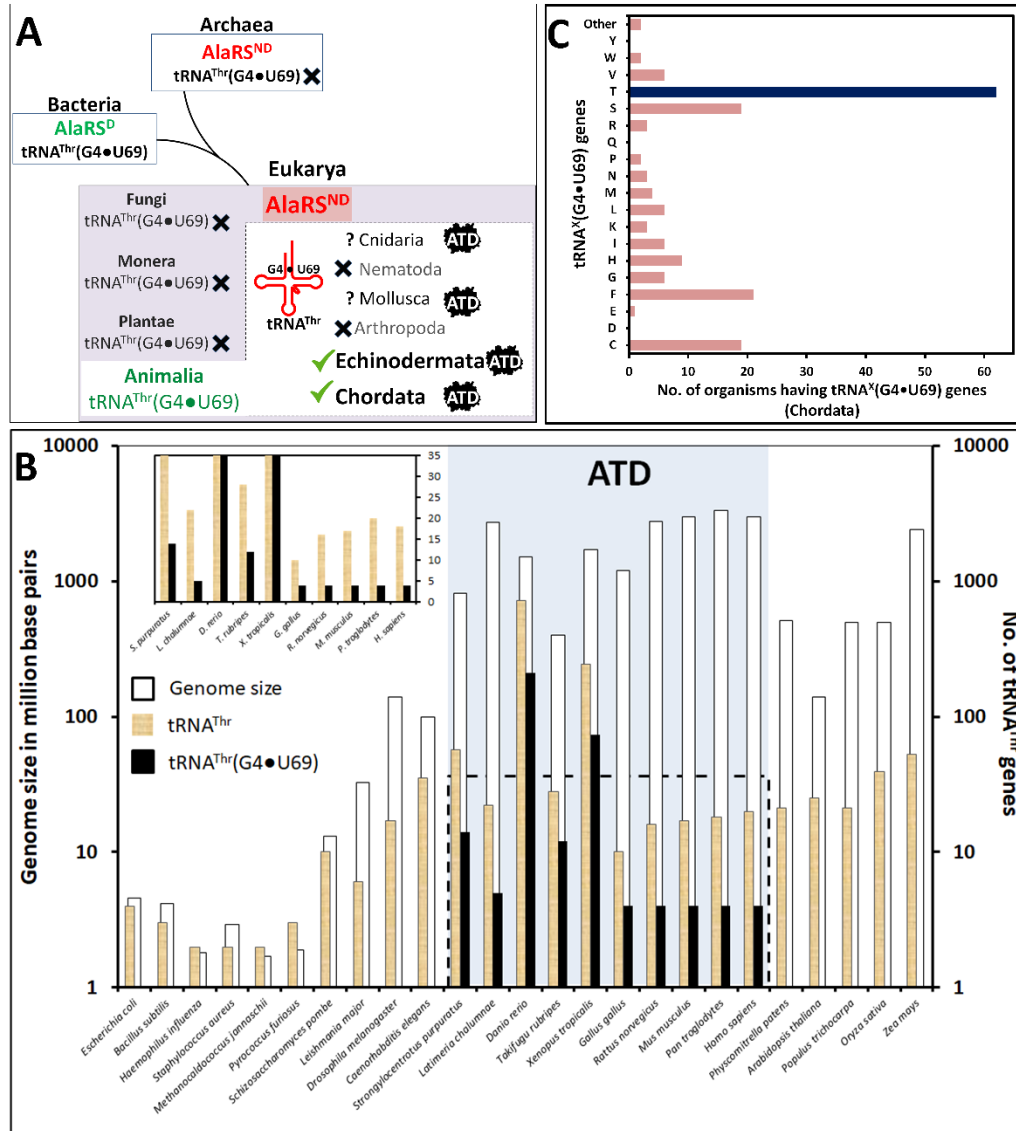

690

691 **Figure 6. Enrichment of tRNA<sup>Thr</sup>(G4•U69) genes and presence of ATD show strict**  
 692 **association.** (A) Distribution of AlaRS<sup>ND</sup>, tRNA<sup>Thr</sup>(G4•U69) genes, and ATD in different  
 693 domains of life. tRNA gene sequences of Cnidaria and Mollusca are not available in the  
 694 database. (B) Bar graph (logarithmic scale) depicting genome size, total number of tRNA<sup>Thr</sup>  
 695 genes, and number of tRNA<sup>Thr</sup>(G4•U69) genes occurring in representative organisms belonging  
 696 to all the three domains of life. Inset showing the number of total tRNA<sup>Thr</sup> genes and  
 697 tRNA<sup>Thr</sup>(G4•U69) genes in normal scale; genome size has not been shown for the sake of clarity.

698 Presence of ATD is highlighted in light blue box. Data for occurrence of AlaRS<sup>ND</sup> and  
699 tRNA<sup>Thr</sup>(G4•U69) genes have been taken from **Sun et al., 2016**. (C) Bar graph showing the  
700 number of organisms containing (G4•U69)-harboring tRNA genes which code for tRNAs  
701 specific for various proteinogenic amino acids.

702

703

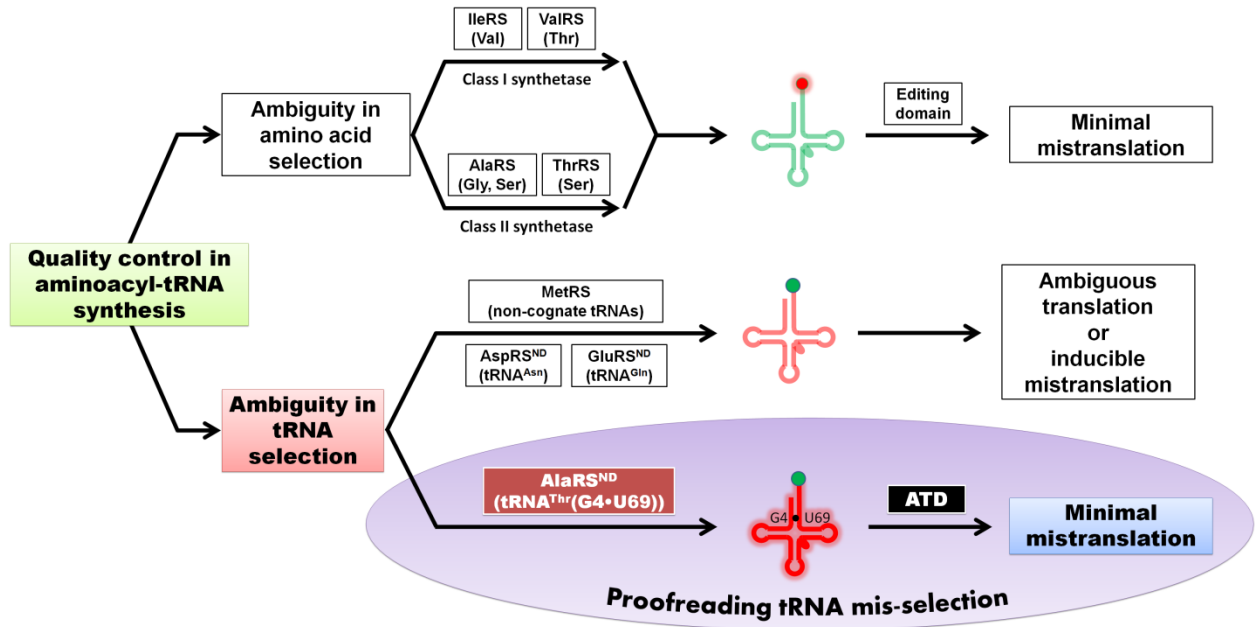

704

705 **Figure 7. ATD is a unique and dedicated proofreading factor that rectifies a critical tRNA**  
706 **selection error.** Model for mis-selection and consequent misacylation of tRNA<sup>Thr</sup>(G4•U69) with  
707 L-alanine by AlaRS<sup>ND</sup>, and its subsequent proofreading by ATD. Cognate and non-cognate  
708 tRNAs (clover leaf model) are colored in green and red, respectively. Likewise, cognate and  
709 non-cognate amino acids (circle) are rendered in green and red, respectively.

710

711 **Supplementary figures and tables**

|       |       |       |       |       |       |       |       |       |       |       |       |       |       |       |
|-------|-------|-------|-------|-------|-------|-------|-------|-------|-------|-------|-------|-------|-------|-------|
| LmDTD | 100   |       |       |       |       |       |       |       |       |       |       |       |       |       |
| HvDTD | 37    | 100   |       |       |       |       |       |       |       |       |       |       |       |       |
| DrDTD | 47    | 55    | 100   |       |       |       |       |       |       |       |       |       |       |       |
| XlDTD | 47    | 56    | 77    | 100   |       |       |       |       |       |       |       |       |       |       |
| GgDTD | 48    | 55    | 79    | 83    | 100   |       |       |       |       |       |       |       |       |       |
| MmDTD | 49    | 57    | 77    | 80    | 89    | 100   |       |       |       |       |       |       |       |       |
| HsDTD | 48    | 54    | 76    | 81    | 88    | 95    | 100   |       |       |       |       |       |       |       |
| LmATD | 16    | 23    | 18    | 23    | 21    | 21    | 21    | 100   |       |       |       |       |       |       |
| HvATD | 17    | 26    | 19    | 24    | 20    | 19    | 21    | 38    | 100   |       |       |       |       |       |
| DrATD | 18    | 25    | 22    | 26    | 23    | 22    | 22    | 34    | 51    | 100   |       |       |       |       |
| XlATD | 19    | 22    | 23    | 25    | 23    | 23    | 23    | 30    | 48    | 64    | 100   |       |       |       |
| GgATD | 21    | 23    | 25    | 26    | 27    | 24    | 24    | 29    | 45    | 61    | 56    | 100   |       |       |
| MmATD | 20    | 23    | 23    | 27    | 27    | 24    | 24    | 32    | 51    | 68    | 63    | 66    | 100   |       |
| HsATD | 18    | 23    | 22    | 24    | 24    | 23    | 24    | 30    | 49    | 66    | 65    | 68    | 85    | 100   |
|       | LmDTD | HvDTD | DrDTD | XlDTD | GgDTD | MmDTD | HsDTD | LmATD | HvATD | DrATD | XlATD | GgATD | MmATD | HsATD |

712

713 **Figure 1—figure supplement 1. DTD and ATD show less than 30% sequence identity.**

714 Matrix showing percentage identities between DTDs, between ATDs as well as between DTDs

715 and ATDs belonging to representative organisms. Lm, *Leishmania major*; Hv, *Hydra vulgaris*;

716 Dr, *Danio rerio*; Xl, *Xenopus laevis*; Gg, *Gallus gallus*; Mm, *Mus musculus*; Hs, *Homo sapiens*.

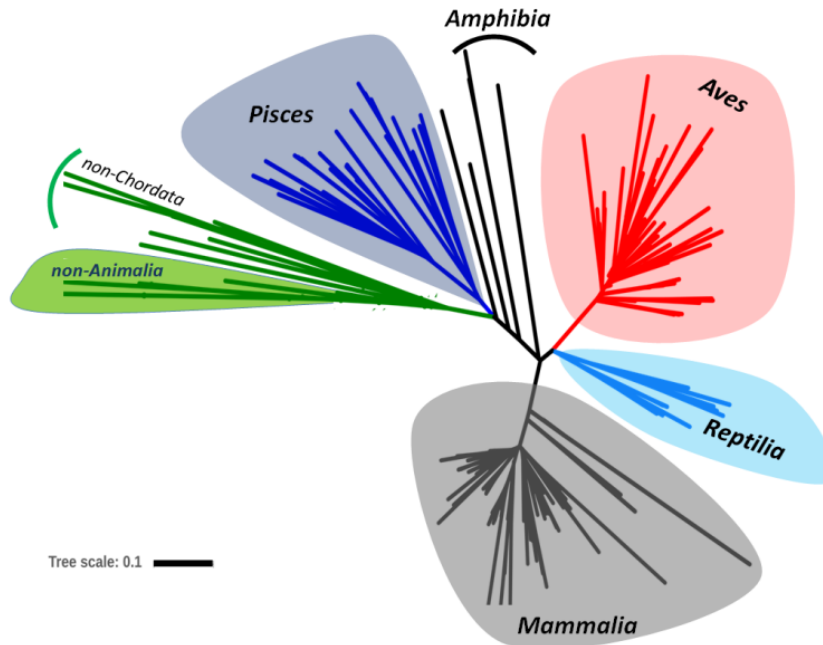

717

718 **Figure 1—figure supplement 2. ATD exhibits exclusive distribution in kingdom Animalia.**

719 Phylogenetic analysis depicting the presence of ATD mainly in kingdom Animalia, and more  
720 specifically in phylum Chordata, which comprises Pisces, Amphibia, Reptilia, Aves and  
721 Mammalia. The few non-Animalia that harbor ATD are mostly parasites of various chordates,  
722 hence the possibility of horizontal transfer of ATD gene.

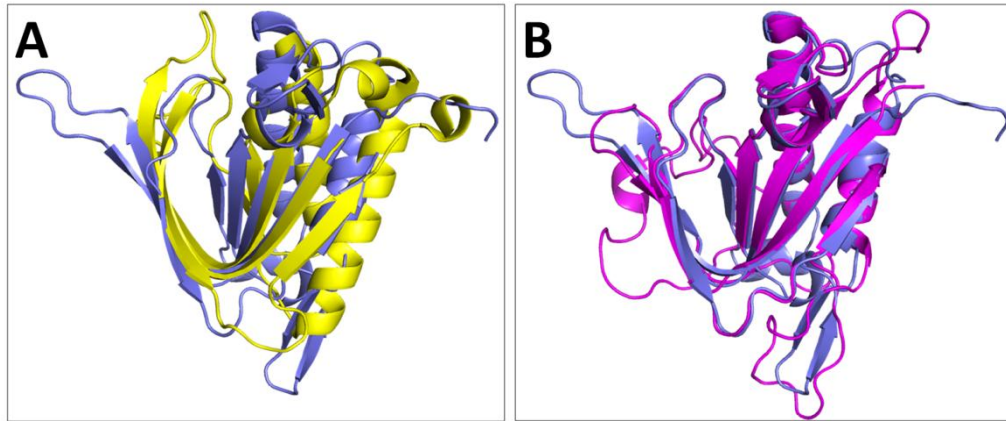

723

724 **Figure 1—figure supplement 3. ATD and NTD are structural homologs belonging to the**  
725 **DTD-like fold. (A)** Structural overlap of MmATD monomer (blue) on PabNTD monomer  
726 (yellow; PDB id: 3PD3) (r.m.s.d., 3.34 Å over 77 C $\alpha$  atoms) showing that the two belong to the  
727 same fold. **(B)** Structural overlap of MmATD monomer (blue) on LmATD monomer (magenta;  
728 PDB id: 1TC5) (r.m.s.d., 1.29 Å over 148 C $\alpha$  atoms).

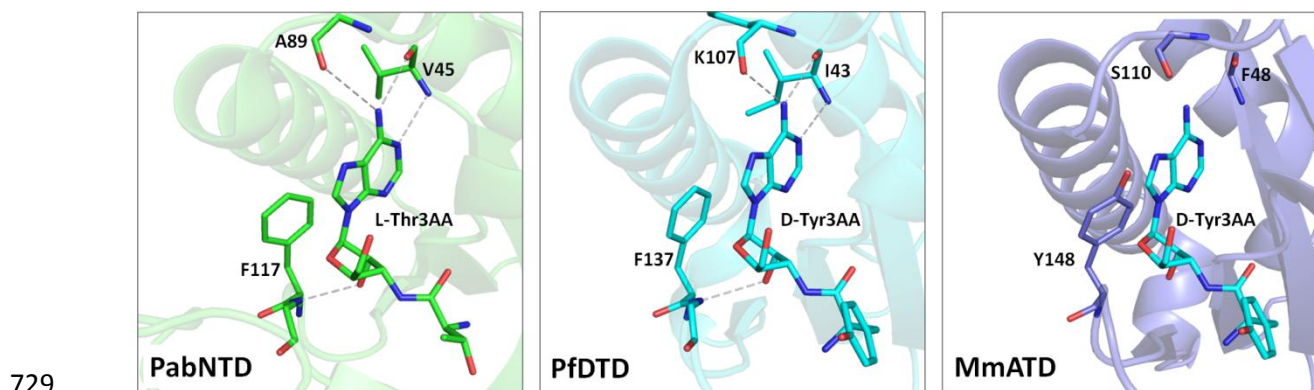

**Figure 2—figure supplement 1. The adenine-binding pocket is conserved in the DTD-like fold.** The elements of adenine-binding pocket of the DTD-like fold, encompassing NTD, DTD and ATD, are conserved. The ligand D-tyrosyl-3'-aminoadenosine (D-Tyr3AA) in MmATD has been modeled on the basis of structural overlap of MmATD on PfDTD (PDB id: 4NBI). The PDB id for PabNTD is 3PD3.



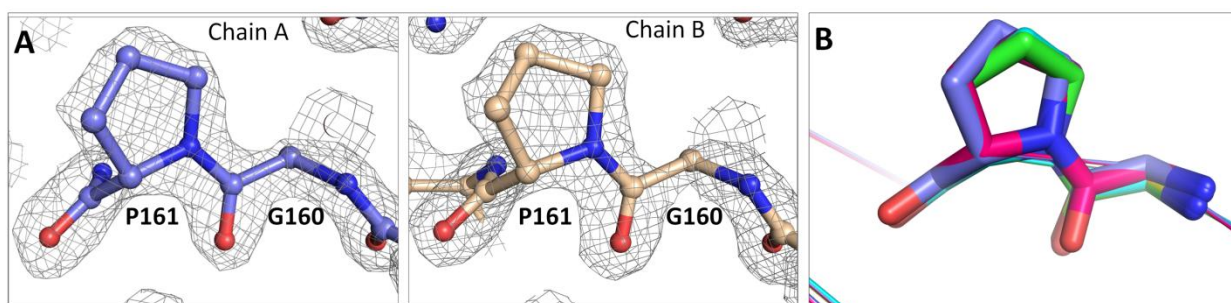

736

737 **Figure 2—figure supplement 2. ATD has an active site Gly-*trans*Pro motif.** (A)  $(2F_o - F_c)$   
738 map, contoured at  $2\sigma$ , showing clean density for the Gly-*trans*Pro motif of both protomers  
739 present in the asymmetric unit of MmATD crystal structure. (B) Structural superposition of  
740 LmATD protomers (cyan, green, purple and yellow; PDB id: 1TC5) on MmATD protomers  
741 (blue and magenta) highlighting the *trans* conformation of the active site Gly-Pro motif in both  
742 proteins.

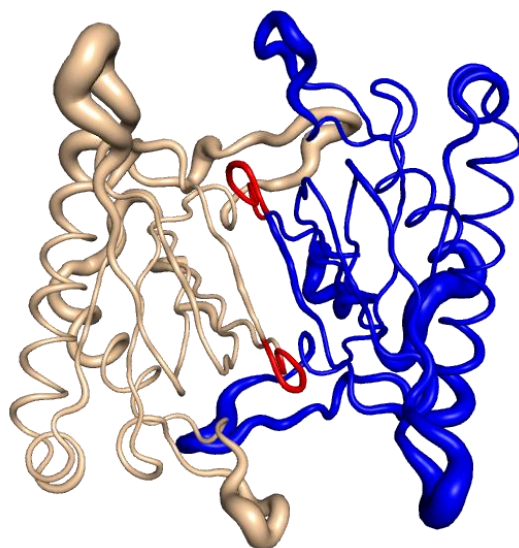

743

744 **Figure 2—figure supplement 3. Atomic B-factor analysis of MmATD shows rigidity of Gly-**  
745 **transPro motif.** Backbone representation of MmATD showing the variation in atomic B-factor.  
746 Regions represented as thin lines are more rigid and therefore have low B-factor values, whereas  
747 those depicted as thick lines are more flexible and thus have higher values. The atomic B-factor  
748 for the structure lies in the range 18–62 Å<sup>2</sup>. Regions depicted in red represent glycine and proline  
749 residues of the Gly-*trans*Pro motif, whose average B-factor is 24 Å<sup>2</sup> (B-factor of protein is 31  
750 Å<sup>2</sup>). This value is similar to that of PfDTD (B-factors of Gly-*cis*Pro motif and protein are 25 Å<sup>2</sup>  
751 and 29 Å<sup>2</sup>, respectively; PDB id: 4NBI), showing that the Gly-*trans*Pro motif in ATD is rigidly  
752 fixed like the Gly-*cis*Pro motif in DTD. The two monomers of ATD homodimer have been  
753 rendered in different colours.

754

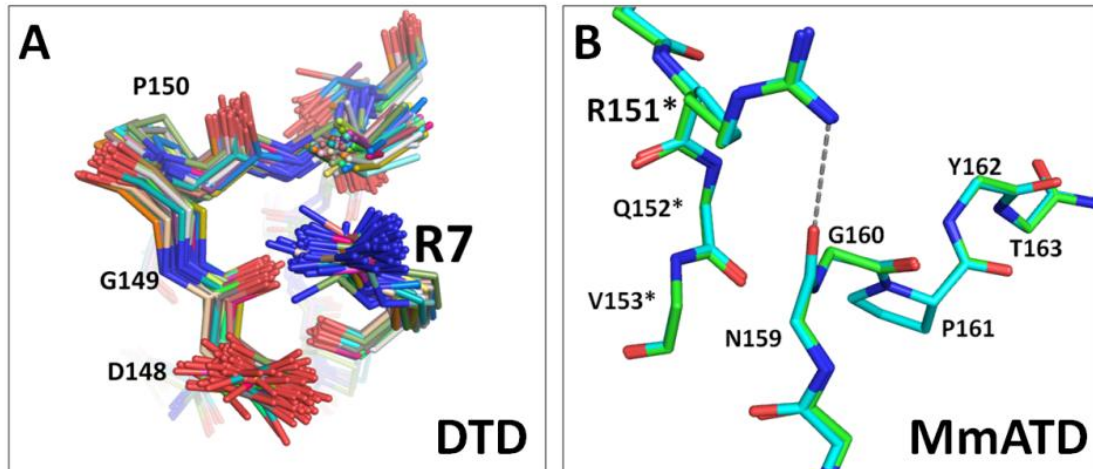

755

756 **Figure 2—figure supplement 4. An arginine is involved in the rigid fixation of Gly-Pro**

757 **motifs in DTD and ATD. (A)** Structural superposition of 107 protomers of DTD from 19 PDBs

758 and 5 different organisms showing rigid fixation of Gly-*cis*Pro motif by a conserved interaction

759 with the side chain of a highly conserved arginine (Arg7, PfDTD) from the same monomer.

760 Numbering of residues is according to PfDTD. **(B)** Structural overlap of the two protomers of

761 MmATD showing that Gly-*trans*Pro motif in ATD is firmly fixed by a conserved interaction

762 with the side chain of an invariant arginine (Arg151). Residues from the dimeric counterpart are

763 indicated by \*.

764

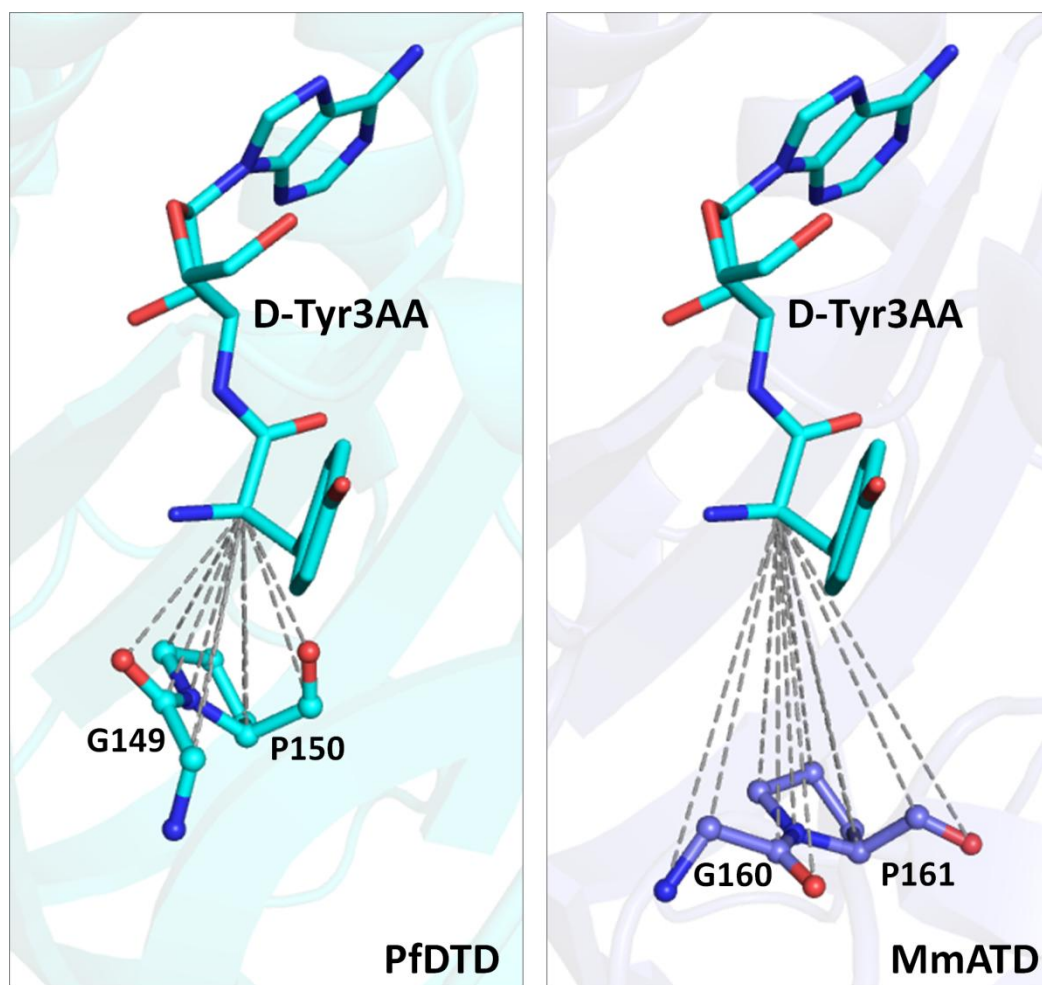

765

766 **Figure 2—figure supplement 5. ATD has “additional” space in its active site pocket**  
767 **compared to DTD.** Comparison between active site pockets of PfDTD (PDB id: 4NBI) and  
768 MmATD showing “additional” space in the latter due to the inward movement of Gly-Pro  
769 carbonyl oxygens. For MmATD, the ligand was modeled in the active site after superposition of  
770 MmATD dimer on PfDTD dimer.

771

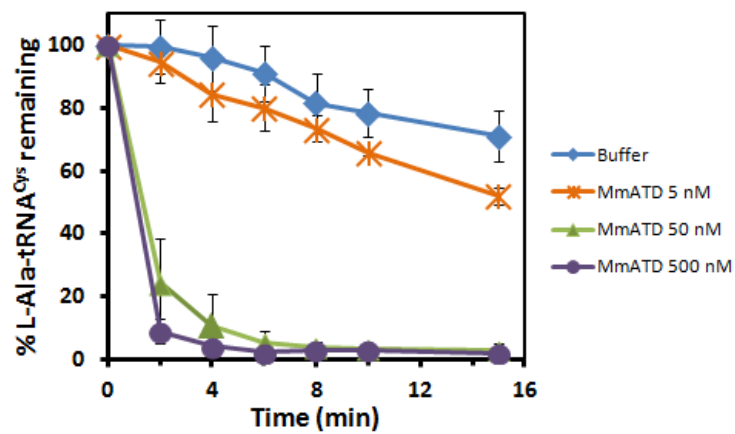

772

773 **Figure 4—figure supplement 1. ATD can also act on L-Ala-tRNA<sup>Cys</sup>(G4•U69). Deacylation**

774 of L-Ala-tRNA<sup>Cys</sup>(G4•U69) by different concentrations of MmATD.

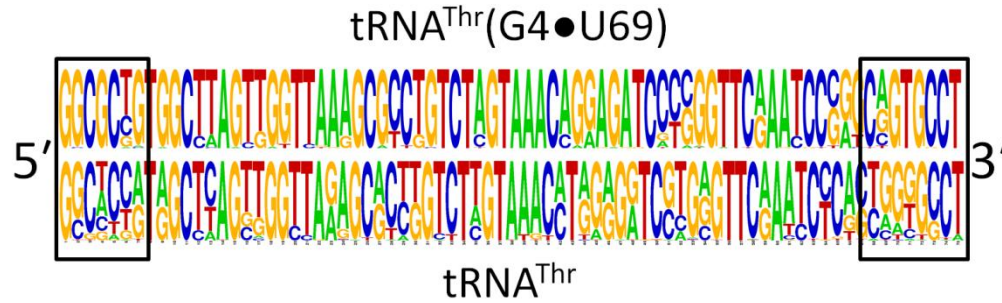

775

776 **Figure 4—figure supplement 2. Acceptor stem elements of tRNA<sup>Thr</sup>(G4•U69) genes are**  
777 **highly conserved.** Consensus sequence showing significantly higher conservation of acceptor  
778 stem residues (enclosed in boxes) in tRNA<sup>Thr</sup>(G4•U69) genes than in non-G4•U69-containing  
779 tRNA<sup>Thr</sup> genes. The gene sequences taken for analysis belong to the following representative  
780 organisms: *Strongylocentrotus purpuratus*, *Latimeria chalumnae*, *G. gallus*, *M. musculus*, *H.*  
781 *sapiens*.

782 **Table S1. Crystallographic data collection and refinement statistics**

| <b>MmATD</b>                   |                     |
|--------------------------------|---------------------|
| <b>Data Collection</b>         |                     |
| Space group                    | $P2_12_12_1$        |
| Cell dimensions:               |                     |
| $a$ (Å)                        | 43.37               |
| $b$ (Å)                        | 75.35               |
| $c$ (Å)                        | 103.61              |
| Resolution range (Å)*          | 50–1.86 (1.93–1.86) |
| Total Observations             | 166914              |
| Unique reflections             | 29268 (1473)        |
| Completeness (%)               | 89.5 (51.2)         |
| $R_{\text{merge}}$ (%)         | 7.6 (38.0)          |
| $\langle I/(\sigma)I \rangle$  | 21.8 (2.4)          |
| Redundancy                     | 6.4 (3.7)           |
| <b>Data refinement</b>         |                     |
| Resolution (Å)                 | 1.86                |
| No. of reflections             | 24840               |
| $R_{\text{work}}$ (%)          | 20.35               |
| $R_{\text{free}}$ (%)**        | 24.96               |
| Monomers / a.u.                | 2                   |
| No. of residues                | 325                 |
| No. of atoms                   | 2721                |
| Protein                        | 2502                |
| Water                          | 219                 |
| R.m.s. deviation               |                     |
| Bond lengths (Å)               | 0.018               |
| Bond angles (°)                | 2.040               |
| Mean B value (Å <sup>2</sup> ) |                     |
| Protein                        | 31.28               |
| Water                          | 35.59               |

783 \*Values in parentheses are for the highest resolution shell.

784 \*\*Throughout the refinement, 5% of the total reflections were held aside for  $R_{\text{free}}$ .

785

786 **Table S2. “Additional” space in ATD’s active site pocket.** Comparison of distances between  
 787 atoms of Gly-Pro residues and C $\alpha$  of the ligand D-Tyr3AA for PfDTD (PDB id: 4NBI) and  
 788 MmATD<sup>†</sup>.

| Gly- <i>cis</i> Pro<br>(PfDTD) | Distance in Å<br>(DTD) |     | Atom       | Distance in Å<br>(ATD) |     | Gly- <i>trans</i> Pro<br>(MmATD <sup>†</sup> ) |
|--------------------------------|------------------------|-----|------------|------------------------|-----|------------------------------------------------|
|                                | Monomer                |     |            | Monomer                |     |                                                |
|                                | A                      | B   |            | A                      | B   |                                                |
| Gly149                         | 6.5                    | 6.3 | N          | 7.7                    | 7.8 | Gly160                                         |
|                                | 5.1                    | 4.9 | C $\alpha$ | 6.4                    | 6.5 |                                                |
|                                | 4.2                    | 4.1 | C'         | 6.7                    | 6.9 |                                                |
|                                | 3.8                    | 3.7 | O          | 7.3                    | 7.4 |                                                |
| Pro150                         | 4.3                    | 4.3 | N          | 6.8                    | 7.0 | Pro161                                         |
|                                | 5.1                    | 5.1 | C $\alpha$ | 7.7                    | 7.8 |                                                |
|                                | 4.6                    | 4.5 | C'         | 7.2                    | 7.2 |                                                |
|                                | 3.4                    | 3.3 | O          | 8.1                    | 8.2 |                                                |
|                                | 5.7                    | 5.8 | C $\beta$  | 8.3                    | 8.3 |                                                |
|                                | 4.9                    | 5.2 | C $\gamma$ | 7.5                    | 7.2 |                                                |
|                                | 4.3                    | 4.4 | C $\delta$ | 6.8                    | 6.8 |                                                |

789 <sup>†</sup> For MmATD, the distances were calculated by modelling the ligand in the active site after  
 790 superposition of MmATD dimer on PfDTD dimer.



791 **Table S3. Comparative analysis of enrichment of tRNA<sup>Thr</sup>(G4•U69) genes and**  
 792 **tRNA<sup>Cys</sup>(G4•U69) genes in representative organisms. Relative abundance of**  
 793 **tRNA<sup>Thr</sup>(G4•U69) genes and tRNA<sup>Cys</sup>(G4•U69) genes in representative organisms.**

| Organism                              | tRNA <sup>Thr</sup> genes |        |             | tRNA <sup>Cys</sup> genes |        |            |
|---------------------------------------|---------------------------|--------|-------------|---------------------------|--------|------------|
|                                       | Total                     | G4•U69 | %           | Total                     | G4•U69 | %          |
| <i>Strongylocentrotus purpuratus*</i> | 57                        | 14     | <b>24.6</b> | 31                        | 0      | <b>0</b>   |
| <i>Latimeria chalumnae</i>            | 22                        | 5      | <b>22.7</b> | 21                        | 2      | <b>10</b>  |
| <i>Danio rerio</i>                    | 722                       | 209    | <b>28.9</b> | 144                       | 1      | <b>0.7</b> |
| <i>Takifugu rubripes</i>              | 28                        | 12     | <b>42.9</b> | 12                        | 0      | <b>0</b>   |
| <i>Xenopus tropicalis</i>             | 245                       | 74     | <b>30.2</b> | 83                        | 2      | <b>2.4</b> |
| <i>Gallus gallus</i>                  | 10                        | 4      | <b>40.0</b> | 10                        | 0      | <b>0</b>   |
| <i>Rattus norvegicus</i>              | 16                        | 4      | <b>25.0</b> | 40                        | 0      | <b>0</b>   |
| <i>Mus musculus</i>                   | 17                        | 4      | <b>23.5</b> | 57                        | 1      | <b>1.8</b> |
| <i>Pan troglodytes</i>                | 18                        | 4      | <b>22.2</b> | 27                        | 0      | <b>0</b>   |
| <i>Homo sapiens</i>                   | 20                        | 4      | <b>20.0</b> | 29                        | 1      | <b>3.4</b> |

794 \* *Strongylocentrotus purpuratus* is the only organism known so far that does not belong to  
 795 phylum Chordata (it belongs to phylum Echinodermata) but shows enrichment of  
 796 tRNA<sup>Thr</sup>(G4•U69) genes.

797

798 **Movie 1. The flip from Gly-*cis*Pro in DTD to Gly-*trans*Pro in ATD.** Movie depicting the  
799 remodeling of the local network of interactions due to *cis*-to-*trans* switch.

800

801 **Data 1. List of organisms whose genomes have been sequenced, highlighting the presence**  
802 **or absence of ATD.**
